1 **Title**

2 **Evolution of the ribbon-like organization of the Golgi apparatus in animal cells.**

3  
4 **Authors**

5 Giovanna Benvenuto<sup>1§</sup>, Serena Leone<sup>1§</sup>, Emanuele Astoricchio<sup>1</sup>, Sophia Bormke<sup>2</sup>, Sanja  
6 Jasek<sup>3</sup>, Enrico D'Aniello<sup>1</sup>, Maike Kittelmann<sup>4</sup>, Kent McDonald<sup>5</sup>, Volker Hartenstein<sup>6</sup>, Valentina  
7 Baena<sup>7</sup>, Héctor Escrivà<sup>8</sup>, Stephanie Bertrand<sup>8</sup>, Bernd Schierwater<sup>9</sup>, Pawel Burkhardt<sup>10</sup>, Iñaki  
8 Ruiz-Trillo<sup>11</sup>, Gáspár Jékely<sup>3</sup>, Jack Ullrich-Lüter<sup>2</sup>, Carsten Lüter<sup>2</sup>, Salvatore D'Aniello<sup>1</sup>, Maria  
9 Ina Arnone<sup>1</sup>, Francesco Ferraro<sup>1,12, \*</sup>

10

11 **Authors affiliations**

12 <sup>1</sup>Department of Biology and Evolution of Marine Organisms, Stazione Zoologica Anton  
13 Dohrn (SZN), Naples, Italy; <sup>2</sup>Museum für Naturkunde, Berlin, Germany; <sup>3</sup>Living Systems  
14 Institute, University of Exeter, UK; <sup>4</sup>Department of Biological and Medical Sciences, Oxford  
15 Brookes University, Oxford, UK; <sup>5</sup>Electron Microscope Lab, University of California Berkeley,  
16 Berkeley, CA, U.S.A.; <sup>6</sup>Department of Molecular, Cell and Developmental Biology, University  
17 of California Los Angeles (UCLA), Los Angeles, CA, U.S.A.; <sup>7</sup>Department of Cell Biology,  
18 UConn Health, Farmington, CT, U.S.A.; <sup>8</sup>Sorbonne Université, CNRS, Biologie Intégrative  
19 des Organismes Marins, BIOM, F-66650, Banyuls-sur-Mer, France; <sup>9</sup>Institute of Ecology and  
20 Evolution, Hannover University of Veterinary Medicine Foundation, Hannover, Germany;  
21 <sup>10</sup>Michael Sars Centre, University of Bergen, Bergen, Norway; <sup>11</sup>Institut de Biologia Evolutiva  
22 (CSIC-Universitat Pompeu Fabra), Barcelona, Spain.

23

24 § These authors contributed equally

25 <sup>12</sup> Lead contact

26 \* Correspondence: francesco.ferraro@szn.it

27

28 **Keywords**

29 Golgi apparatus; Golgi structure; Golgi ribbon; organelle; evolution; metazoans; GRASP,  
30 Golgin-45; AlphaFold2

31

32 **Summary**

33 The structural and functional unit of the Golgi apparatus is the stack, formed by piled  
34 membranous cisternae<sup>1,2</sup>. Among eukaryotes the number of stacks ranges from one to  
35 several copies per cell<sup>3</sup>. When present in multiple copies, the Golgi is observed in two  
36 arrangements: stacks either remain separated or link into a centralized structure referred to  
37 as the “ribbon”, after its description by Camillo Golgi<sup>4</sup>. This Golgi architecture is considered  
38 to be restricted to vertebrate cells and its biological functions remain unclear<sup>3,5-9</sup>.

39 Here we show that the ribbon-like Golgi organization is instead present in the cells of several  
40 animals belonging to the cnidarian and bilaterian clades, implying its appearance in their  
41 common ancestor. We hypothesize a possible scenario driving this structural innovation. The  
42 Golgi Reassembly and Stacking Proteins, GRASPs, are central to the formation of the  
43 mammalian Golgi ribbon by mediating stack tethering<sup>10-15</sup>. To link the stacks, GRASPs must  
44 be correctly oriented on Golgi membranes through dual anchoring including myristoylation  
45 and interaction with a protein partner of the Golgin class<sup>16,17</sup>. We propose that the evolution  
46 of binding of Golgin-45 to GRASP led to Golgi stack tethering and the appearance of the  
47 ribbon-like organization. This hypothesis is supported by AlphaFold2 modelling of Golgin-  
48 45/GRASP complexes of animals and their closest unicellular relatives. Early evolution and  
49 broad conservation of the ribbon-like Golgi architecture imply its functional importance in  
50 animal cellular physiology. We anticipate that our findings will stimulate a wave of new  
51 studies on the so far elusive biological roles of this Golgi arrangement.

52

53

54

55

## 56 **Results and Discussion**

57 *Deuterostome animals assemble Golgi ribbons.* According to the current consensus, only  
58 vertebrate cells form a centralized Golgi structure with multiple stacks aligned and linked to  
59 each other. This Golgi organization is known as the ribbon and its functions remain unclear  
60 to this date<sup>3,5,6,9,18</sup>. We were therefore intrigued by morphological data suggestive of Golgi  
61 centralization in the embryos of two sea urchin species, *Strongylocentrotus purpuratus* and  
62 *Lytechinus variegatus*<sup>19,20</sup>, and set out to analyze Golgi dynamics in a third one,  
63 *Paracentrotus lividus*. Time-course analysis of a fluorescent Golgi reporter showed that early  
64 in development, throughout the cleavage stage, the Golgi is present as separate elements  
65 which then cluster into centralized structures before hatching of the blastula (Figure 1A, S1A,  
66 S1B). Golgi clustering is rapid: within one hour, Golgi elements increase 10-fold in size while  
67 their number decreases 3-fold (Figure 1B, 1C and Movie S1). Afterwards, centralized Golgi  
68 complexes are observed in all cells of the embryo and at all developmental stages up to the  
69 planktonic pluteus larva (Figure 1A and S1C). Confocal imaging at higher magnification of  
70 post-clustering stages showed a morphology strongly reminiscent of the Golgi ribbon as  
71 observed in mammalian cells (Figure S1D). In mammalian cells, the Golgi ribbon can be  
72 visualized by electron microscopy<sup>18</sup>. We therefore analyzed sea urchin Golgi morphology at  
73 the ultrastructural level. As Golgi stack dimers have been observed in *Drosophila*  
74 *melanogaster* cells<sup>21</sup>, which notoriously display dispersed Golgi elements<sup>22</sup>, and even in  
75 mammalian cells after ribbon unlinking by microtubule depolymerization<sup>23</sup>, we defined Golgi  
76 centralization as “ribbon-like” only when three or more closely apposed stacks were  
77 observed in electron micrographs (Figure S1E). In sea urchin, at the ultrastructural level, the  
78 arrangement of Golgi elements recapitulated confocal microscopy observations. Separated  
79 stacks cluster and finally establish connections with each other during early development,  
80 confirming that sea urchins centralize their Golgi apparatus into a ribbon-like architecture  
81 (Figure 1D). Centralized Golgi complexes were previously observed in the early  
82 *Strongylocentrotus purpuratus* embryo<sup>19</sup>. Indeed, we also observed ribbon-like Golgis in the  
83 pluteus of this sea urchin species (Figure S1F). Like the ribbon of mammalian cells, sea  
84 urchin’s centralized Golgi undergoes disassembly/reassembly cycles during mitosis (Figure  
85 S1G) and its maintenance requires an intact microtubule network (Figure S1H-S1I)<sup>2,5,24-26</sup>. All  
86 these characteristics strongly indicate that the centralized Golgi complexes of sea urchin  
87 cells are indeed ribbons. Sea urchins as echinoderm representatives branch off from the  
88 deuterostome lineage at a basal position and form part of the sister group to all remaining  
89 chordates including vertebrates. Therefore, the mechanisms mediating Golgi centralization  
90 are likely to be conserved across the deuterostome clade. Indeed, we observed Golgi stack  
91 clustering and ribbon-like formation during development in cells of two non-vertebrate  
92 chordates, the sea squirt *Ciona robusta* (tunicate) and the lancelet *Branchiostoma*

93 *lanceolatum* (cephalochordate) (Figure 1E and 1F). As Golgi centralization also occurs in  
94 mammalian early embryos<sup>27</sup>, our observations not only show that it is a conserved feature  
95 across deuterostomes, but also suggest that it might play a role during the initial stages of  
96 their development. Our findings also raise the intriguing possibility that Golgi centralization  
97 may have evolved before the split between deuterostomes and other animal groups. If this  
98 were the case, then centralization of Golgi stacks should be also observed in non-  
99 deuterostomes.

100

101 *Golgi architecture in holozoans.* By examining published and newly generated data, we  
102 surveyed Golgi ultrastructure in representatives of several animal taxa and closely related  
103 unicellular eukaryotes, which, together, comprise the eukaryotic holozoan clade. Ribbon-like  
104 presence was assessed by adopting the criterion used for sea urchin and other  
105 deuterostomes (Figure S1E). In mammals, ribbon architecture, though widespread, is not  
106 ubiquitous. Differentiated tissues such as muscles, acid-secreting gastric cells, and spinal  
107 ganglion neurons, for instance, display Golgi complexes made by separated stacks<sup>28-30</sup>. For  
108 this reason, wherever possible, several cell types of the organisms under consideration were  
109 inspected. We first set out by looking at bilaterians other than deuterostomes. In the cells of  
110 the marine worm *Symsagittifera roscoffensis* (xenacoelomorph), separated stacks were  
111 observed (not shown). Interestingly, some of its secretory cells displayed closely apposed,  
112 though clearly distinct, Golgi stacks: an intermediate organization between separated Golgi  
113 elements and a ribbon-like organization (Figure 2A and S2A). Ribbon-like Golgis were found  
114 in epidermal cells of the three-lobed larva of the brachiopod *Calloria inconspicua* and in  
115 several cell types of the marine annelid *Platynereis dumerilii* (Figures 2B, 2C, S2B and  
116 Movie S2). As Ramón y Cajal described ribbon-like Golgis in neurons and epithelial cells of  
117 the common earthworm<sup>31</sup>, we conclude that this Golgi organization is common among  
118 annelids. In mollusks, a centralized Golgi that fragments at mitosis was observed in  
119 spermatocytes of the snail *Paludina vivipara* more than a century ago<sup>32</sup>, while other reports  
120 show ribbon-like Golgi complexes in other species (e.g., *Helix pomatia*<sup>33</sup> and *Helix*  
121 *aspersa*<sup>34</sup>). Cells of the fruit fly *Drosophila melanogaster*, an arthropod, and of the  
122 roundworm *Caenorhabditis elegans*, a nematode, two model organisms widely used in  
123 genetics and cell biology, display Golgi complexes consisting of several, separated  
124 stacks<sup>21,22,35,36</sup>. To test whether Golgi stack decentralization is an arthropod feature, as  
125 opposed to *Drosophila*/insect-specific, we analyzed the ultrastructure of the crustacean  
126 *Parhyale hawaiiensis*, observing separated stacks in neurons (Figure 2D) and in all other  
127 inspected cell types (not shown). It is therefore likely that a decentralized Golgi is the typical  
128 configuration in arthropods, not just of *Drosophila* and other insects (e.g., bees, aphids and  
129 mosquitos<sup>37-39</sup>). We then analyzed cnidarians: in the hydrozoan *Clytia hemisphaerica*, the

130 secretory gland cells of the gastroderm, but not other cell types, display stacks linked into a  
131 ribbon-like structure (Figure 2E), which is also observed in phagocytic cells of another  
132 cnidarian, the actinia *Phelliactis robusta*<sup>40</sup>. In the ctenophore *Mnemiopsis leidyi*, epithelial  
133 and comb cells (Figure 2F and S2E), nerve net neurons, mesogleal neurons, and sensory  
134 cells<sup>41,42</sup> all display separated stacks. Among other animals, we found a single Golgi stack in  
135 all cells of two placozoan species: *Trichoplax adhaerens* (Figure 2G, S2C and S2D) and  
136 *Hoilungia hongkongensis*<sup>43</sup>. Like placozoans, the sea sponge *Oscarella carmela* (Figure 2H  
137 and reference<sup>44</sup>) and other species (genera *Chondrosia*, *Crambe* and *Petrosia*; not shown)  
138 have a single Golgi stack per cell.

139 In choanoflagellates and filastereans, which are unicellular holozoans, the Golgi is also  
140 present as a single stack per cell (Figure 2I and references<sup>44,45</sup>). In summary, despite a  
141 relatively small sampling (Figure S2F), ribbon-like Golgi complexes are easily observed in  
142 cells of cnidarians and bilaterians, and not found outside these animal taxa. The presence of  
143 multiple stacks per cell is a precondition for their clustering and ribbon formation, but it is not  
144 sufficient. In fact, while usually displaying a single Golgi stack per cell (Figure 2H, and  
145 reference<sup>44</sup>), in rare instances cells with multiple but separated stacks are observed in  
146 sponges, as is the case in the gemmule's spongocytes of the freshwater species *Ephydatia*  
147 *fluviatilis*<sup>46</sup>. It should be noted that the thin sectioning of electron micrographs does not allow  
148 to assess whether all the Golgi stacks in a cell are linked into a single ribbon-like  
149 organization or form multiple "mini-ribbons". Nonetheless, in those cases where we identified  
150 a ribbon-like organization we can state that the process of stack centralization is clearly  
151 observed.

152 In conclusion, the most parsimonious explanation accounting for our results and the  
153 literature data is that the ribbon-like Golgi likely evolved in the common ancestor of  
154 cnidarians and bilaterians, and was secondarily lost in xenacoelomorphs, arthropods, and  
155 nematodes (Figure 2J).

156  
157 *Putative molecular mediators of ribbon-like Golgi emergence.* Next, we asked which  
158 molecular innovations might have driven the emergence of the ribbon-like Golgi  
159 organization. If, as our survey suggests, this was a single evolutionary event, conservation of  
160 the molecular mechanisms of its formation would be expected. Among the several factors  
161 involved in the formation of the mammalian Golgi ribbon<sup>26,47-56</sup>, the molecular tethers GRASP  
162 (Golgi Reassembly and Stacking Protein) and the coiled-coil proteins collectively known as  
163 Golgins play a central role<sup>8,10-12,15,16,56-60</sup>. GRASPs comprise a highly conserved GRASP  
164 region, made of two atypical PDZ domains in tandem, and an evolutionarily more variable C-  
165 terminal unstructured region (Figure S3A and S3B). While GRASPs are encoded by a single  
166 gene in most eukaryotes, a duplication gave rise to two paralogs in jawed vertebrates

167 (Figure S3C and Data S1A). Involved in several cellular processes<sup>61-64</sup>, GRASPs are  
168 capable of self-interaction and while they were initially considered to promote cisternal  
169 adhesion within the stack<sup>58,65,66</sup>, recent work unequivocally showed that they mediate Golgi  
170 stack tethering and ribbon formation but not cisternal stacking<sup>14,15,67</sup>. The two mammalian  
171 paralogs, GRASP55 and GRASP65, are recruited to Golgi membranes by myristoylation of  
172 the glycine in position 2<sup>65,68</sup>, conserved across holozoans (Data S1A), and by interaction with  
173 Golgin-45 and GM130, respectively (Figure 3A)<sup>57,69</sup>. Such dual-anchoring is required for  
174 ribbon formation as it spatially orients GRASPs and allows their homo-  
175 dimerization/oligomerization in *trans*, thus tethering membranes of distinct Golgi stacks and  
176 promoting ribbon formation<sup>12,16,17</sup>. Golgins (Figure 3A) mediate vesicular traffic specificity<sup>70-72</sup>  
177 and their knockdown results in secretory defects and ribbon unlinking into constituent  
178 stacks<sup>8,73</sup>. The Golgin-45 gene is an innovation of holozoans<sup>74</sup>. In mammals, the Golgin-45  
179 protein interacts with the GRASP paralog GRASP55<sup>57</sup> (Figure 3A); and in cultured cells,  
180 either Golgin-45 knockdown or long-term degran-induced ablation of GRASP55, but not of  
181 GRASP65, result in Golgi ribbon unlinking<sup>15,57</sup>. As GRASP55 is more similar to the single  
182 GRASP proteins present in non-vertebrate bilaterians and cnidarians (Figure S3C), it is  
183 plausible that evolution of GRASP binding by Golgin-45 may have led to GRASP-mediated  
184 stack tethering (i.e., centralization) and ribbon-like Golgi evolution (Figure 3B). We searched  
185 and identified holozoan Golgin-45 homologs, confirming previous findings that this protein  
186 evolved in the common ancestor of holozoans<sup>74</sup> and then was lost in choanoflagellates (Data  
187 S1B). Interestingly, among metazoans, it was also lost in most xenacoelomorphs (Data  
188 S1B), which do not display ribbon-like Golgi (Figures 2A and S2A).

189 The crystal structure of the complex between the C-terminus of mouse Golgin-45 and the  
190 GRASP domain of the conspecific GRASP55 has been solved<sup>75</sup>, highlighting the existence  
191 of three main interaction sites between the two proteins: i) a PDZ-binding motif spanning the  
192 four C-terminal amino acids of Golgin-45; ii) an atypical Zinc finger composed by two  
193 cysteines of Golgin-45 and a cysteine and a histidine in the GRASP domain; iii) the insertion  
194 of nine residues of Golgin-45 into the hydrophobic groove between the two PDZ domains of  
195 GRASP55 (Figure S3D)<sup>75</sup>. Binding experiments showed that the PDZ-binding motif and the  
196 cysteine pair are necessary for Golgin-45/GRASP complex formation, whereas the  
197 contribution of the groove-interacting residues remains unclear<sup>75</sup> (see the section “*Role of*  
198 *groove residues in Golgin-45/GRASP interaction*” of the Supplemental Results and  
199 Discussion). We aligned the C-terminal sequences of holozoan Golgin-45 proteins to assess  
200 conservation of the amino acids involved in GRASP interaction (Figure S3E). The PDZ  
201 binding motif and the cysteine pair are highly conserved, with the notable exception of  
202 *Drosophila melanogaster* and *Parhyale hawaiensis*, whose cells lack ribbon-like Golgi  
203 organization (Figure S3E, refs.<sup>21,22</sup> and Figure 2D), whereas the Golgin-45 residues

204 corresponding to those that interact with the GRASP groove are more variable across  
205 holozoans (Figure S3E).

206 As the AlphaFold2<sup>76,77</sup> model of the mouse Golgin-45/GRASP complex displayed high  
207 confidence and stability (refer to the section “*Interpretation and predictive power of*  
208 *AlphaFold2 models*” of the Supplemental Results and Discussion) and was very similar to  
209 the crystal structure (Figure 3C), we reasoned that Golgin-45/GRASP interactions may be  
210 predicted<sup>78,79</sup> by modelling complexes of conspecific protein pairs. We considered binding to  
211 occur when GRASP interaction with the PDZ-binding motif and formation of the Zinc finger  
212 could be detected in the modelled complex. In bilaterians and cnidarians, all models  
213 predicted binding, except for arthropods (*Drosophila melanogaster* and *Parhyale*  
214 *hawaiensis*), nematodes (*Caenorhabditis elegans*) and the only xenacoelomorph species  
215 with a Golgin-45 gene, *Hofstenia miamia* (Figures 3D and S4A). Golgin-45 was not predicted  
216 to bind its conspecific GRASP in ctenophores, porifera and unicellular filastereans (Figure  
217 3D). The reliability of AlphaFold2 predictions was further corroborated by modeling the  
218 complexes of various point mutants of the mouse Golgin-45 PDZ-binding motif, cysteine  
219 pair, and groove interacting residues that had been experimentally tested in *in vitro* GRASP  
220 binding assays<sup>75</sup>. The models obtained were consistent with the experimental data by those  
221 authors<sup>75</sup> (Figure S4B; see also the section “*Role of groove residues in Golgin-45/GRASP*  
222 *interaction*” of the Supplemental Results and Discussion). Based on structure modelling and  
223 experimental evidence<sup>75</sup>, we therefore deduce that a stable Golgin-45/GRASP interaction  
224 appeared in the common ancestor of cnidarians and bilaterians but was impaired by  
225 subsequent amino acid mutations in arthropod, nematode, and the only xenacoelomorph  
226 proteins (Figures 3E and S4A). In conclusion, AlphaFold2 models lend support to our  
227 hypothesis that the evolution of GRASP binding by Golgin-45 may have driven the  
228 appearance of stack tethering and the emergence of the ribbon-like Golgi organization.

229

## 230 **Conclusions**

231 The ribbon organization of the Golgi apparatus was previously considered to be unique to  
232 vertebrates. The lack of a centralized Golgi in the cells of *D. melanogaster* and *C. elegans*,  
233 two invertebrates widely used in cell biology, may have contributed to cement this view.  
234 Nonetheless, works dating to the early 1900’s already showed the presence of ribbon-like  
235 Golgi complexes in non-vertebrates<sup>31,32</sup>, and further evidence from electron microscopy  
236 analyses of various animal cells accumulated later<sup>33,34,40,80</sup>. Here, we built on this body of  
237 literature by sampling species representative of diverse metazoan taxa and show that  
238 ribbon-like centralization of Golgi stacks is likely to be a newly evolved character of the  
239 ancestor of cnidarians and bilaterians. The frequency with which ribbon-like Golgi complexes  
240 are found, both by our morphological analyses and in the literature, supports the

241 generalizations we made on its evolutionary emergence and secondary loss at the level of  
242 phyla and superphyla (Figure 2J). Based on experimental evidence from studies in  
243 mammalian cells, we also propose a plausible and testable molecular mechanism of  
244 evolution of the ribbon-like Golgi organization. GRASP “resurrection” experiments show that  
245 its self-interacting capability is ancestral<sup>81</sup>. Bootstrapping on this function, and in the context  
246 of cells with multiple stacks, evolution of GRASP binding activity by Golgin-45 may have  
247 driven ribbon-like emergence. Our hypothesis invokes a central role for Golgin-45/GRASP  
248 interaction in the evolution and conservation of the mechanism of formation of Golgi ribbons.  
249 Whether the Golgin-45-dependent spatial orientation of GRASP on Golgi membranes is only  
250 conducive to stack tethering or also to membrane continuity between cisternae of juxtaposed  
251 stacks, as observed in mammalian cells<sup>18,82,83</sup>, remains to be experimentally tested.  
252 GRASP55 is necessary for ribbon formation in mammals and interacts with tens of  
253 proteins<sup>15,84</sup>. If such interactions are evolutionarily conserved, GRASP oligomerization could  
254 provide a molecular scaffold that directly mediates Golgi stack tethering and, indirectly,  
255 coordinates the activity of several factors in the assembly and maintenance of the Golgi  
256 ribbon.

257 In eukaryotes, complex multicellularity evolved several times<sup>85</sup>, but non-animal multicellular  
258 organisms, such as plants and fungi, display multiple separated Golgi stacks<sup>86-88</sup>. Golgi  
259 centralization may thus indicate an evolutionary trajectory with functional requirements  
260 specific to cnidarians/bilaterians and divergent from those of other animals and multicellular  
261 organisms. The question thus arises as to which functions did the ribbon-like Golgi  
262 organization evolve to carry out. As the biological roles of the ribbon remain unclear, we can  
263 only speculate. In deuterostomes, Golgi centralization occurs in early embryogenesis (this  
264 report and reference<sup>27</sup>). This may indicate that the primordial function of the ribbon-like  
265 architecture could have been in development, explaining why some differentiated  
266 mammalian tissues can forgo Golgi ribbons<sup>28-30</sup>. In this hypothetical scenario, the  
267 developmental processes of xenacoelomorphs, arthropods and nematodes must have  
268 adapted to dispense with Golgi centralization altogether.

269 In conclusion, the wide occurrence of the ribbon-like Golgi organization among animals with  
270 well-differentiated cell types is strongly indicative of its functional importance. We expect that  
271 comparative functional studies in several experimental organisms, which became available  
272 in recent years, will prove successful in unravelling which functions the Golgi ribbon plays in  
273 animal cell physiology.

274

## 275 **Acknowledgements**

276 We thank Laura Núñez Pons, Filomena Ristoratore, and Periklis Paganos (Stazione  
277 Zoologica Anton Dohrn, SZN, Italy) for providing electron micrographs of sea sponges, of the



278 sea urchin *Strongylocentrotus purpuratus* and helping with the anatomy of the *Ciona*  
279 *intestinalis* larva; Evelyn Houliston (Villefranche-sur-mer, France) and Mark Terasaki (UConn  
280 Health, USA) for providing the *Clytia hemisphaerica* electron micrograph; Elisabeth Knust  
281 and Michaela Yuan (Max-Planck-Institute of Molecular Cell Biology and Genetics, Dresden,  
282 Germany) and Xavier Bailly (Centre National de la Recherche Scientifique & Université  
283 Pierre et Marie Curie, CNRS-PMC, Roscoff, France) for their help with *S. roscoffensis*  
284 samples; Pedro Martinez Serra (Universitat de Barcelona, Spain) for his valuable  
285 suggestions; Martin Lowe (University of Manchester, UK) and Evelyn Houliston  
286 (Villefranche-sur-mer, France) for their comments on the manuscript. Francesco Ferraro is  
287 supported by SZN intramural funding. Emanuele Astoricchio is supported by a PhD  
288 fellowship funded by the Stazione Zoologica Anton Dohrn (Open University – Stazione  
289 Zoologica Anton Dohrn PhD Program). With the aim of expanding our survey, we would be  
290 grateful to researchers willing to contribute examples of Golgi morphology (electron and light  
291 micrographs) in tissues, species or phyla not covered by the present report. To this purpose,  
292 please contact Francesco Ferraro at the following email addresses: [francesco.ferraro@szn.it](mailto:francesco.ferraro@szn.it)  
293 or [f.ferraro.uk@gmail.com](mailto:f.ferraro.uk@gmail.com).

294

#### 295 **Author contributions**

296 Conceptualization: F.F. Methodology: F.F., M.I.A., S.D., S.L. Investigation: F.F., G.B., S.L.,  
297 E.A., S.Bo. Resources: S.J., M.K., K.M., V.H., V.B., H.E., S.Be., C.L., J.U-L., B.S., P.B., I.R-  
298 T., G.J., E.D. Writing original draft: F.F. Review & Editing: F.F., G.B., S.L., H.E., S.Be, S.D,  
299 J.U-L., C.L., I.R-T., B.S., G.J., P.B., M.I.A.. Visualization: F.F. Supervision: F.F.

300

#### 301 **Declaration of interests**

302 The authors declare no competing interests

303

#### 304 **Figure titles and legends**

305 **Figure 1. Deuterostomes assemble Golgi ribbons.** (A) Embryos of the sea urchin  
306 *Paracentrotus lividus* expressing fluorescent reporters of the Golgi apparatus and the  
307 plasma membrane (PM) were imaged at the indicated stages (hpf, hours post-fertilization;  
308 VEB, very early blastula; PHB, post-hatching blastula; BG, blastopore gastrula) by bright  
309 field and confocal microscopy (maximum intensity projections); right panels show  
310 magnifications of the middle panel insets; scale bars: 20  $\mu$ m. (B) Maximum intensity  
311 projections of time-lapse confocal microscopy of an embryo microinjected as described in  
312 (A) and imaged at the indicated times (hpf); scale bar: 20  $\mu$ m. (C) Number and size (median  
313 and interquartile range are shown) of Golgi objects in the embryo shown in (B) were  
314 measured; \*\*,  $p < 0.01$ ; \*\*\*\*,  $p < 0.0001$ ; Mann-Whitney test, compared to 8.5 hpf. (D)

315 *Paracentrotus lividus*, (E) *Ciona robusta* and (F) *Branchiostoma lanceolatum* embryos were  
316 processed for electron microscopy at the indicated developmental stages; Golgi elements  
317 are outlined (isolated stacks in light ochre; connected stacks in light magenta); scale bars: 1  
318  $\mu\text{m}$ . See also Figure S1 and Movie S1.

319

320 **Figure 2. Golgi architecture in holozoans.** The Golgi organization in holozoan exemplars  
321 from diverse taxa was analyzed at the ultrastructural level; separated and centralized stacks  
322 are highlighted in light ochre and light magenta, respectively. (A) The xenacoelomorph  
323 *Symsagittifera roscoffensis* (Roscoff worm), secretory cell. (B) The brachiopod *Calloria*  
324 *inconspicua*, epidermal cell of the mantle lobe of the three-lobed larva. (C) The annelid  
325 *Platynereis dumerilli*, glial cell of the 3-day old larva. (D) The crustacean *Parhyale*  
326 *hawaiensis*, nerve cell. (E) The jellyfish *Clytia hemisphaerica*, gonad gastrodermal cells. (F)  
327 The ctenophore *Mnemiopsis leidy*: epithelial cells. (G) The placozoan *Tricoplax adhaerens*.  
328 (H) The sea sponge *Oscarella carmela*, choanocyte. (I) The filasterean *Capsaspora*  
329 *owczarzaki*. Scale bars: 1  $\mu\text{m}$ . (J) Deduced evolutionary emergence of the ribbon-like Golgi  
330 organization. Ribbon-like absence in both arthropods and nematodes, which both belong to  
331 the ecdysozoan superphylum, may indicate that loss of Golgi centralization occurred in their  
332 common ancestor. See also Figure S2 and Movie S2.

333

334 **Figure 3. Putative molecular mediators of ribbon-like Golgi emergence.** (A) The Golgi  
335 localized molecular tethers Golgins and GRASPs. Golgins are coiled-coil proteins that  
336 localize to Golgi membranes by a transmembrane region or through recruitment by small  
337 GTPases of the Arf, Arl and Rab families. Golgin localization within the stack  
338 (references<sup>1,8,56,73,89</sup>); their sizes (human homologs, bar length), and their evolutionary  
339 emergence<sup>74</sup> are indicated. (B) Evolution of GRASP-mediated Golgi stack tethering. In  
340 mammalian cells, dual anchoring of GRASPs on Golgi membranes is required for self-  
341 interaction in *trans* and stack tethering<sup>12,16,17</sup>. As GRASP myristoylation is ancestral (see text  
342 and Data S1A), we hypothesize that evolution of Golgin-45 binding to GRASP led to the  
343 emergence of stack linking and ribbon formation. (C) Solved structure (X-ray; PDB  
344 accession code 5H3J) and the AlphaFold2 (AF2) model of the mouse Golgin-45/GRASP  
345 complex. AF2 predicted structure almost overlaps the experimentally solved one (RMSD  
346 3.040 Å for the C $\alpha$  of the last 16 amino acids of the Golgin-45 C-terminal peptide). (D) AF2  
347 models of holozoan GRASPs in complex with their conspecific Golgin-45 C-termini.  
348 Echinoderms, *Strongylocentrotus purpuratus*; annelids, *Platynereis dumerilli*; arthropods,  
349 *Drosophila melanogaster*; nematodes, *Caenorhabditis elegans*; mollusks, *Crassostrea gigas*;  
350 cnidarians, *Nematostella vectensis*; ctenophores, *Mnemiopsis leidy*; placozoans, *Trichoplax*  
351 *adherens*; filastereans, *Capsaspora owczarzaki*. Altered conformations, with respect to the

352 mouse complex, are indicated by the arrows (blue for the PDZ-binding motif, red for the  
 353 cysteine pair and green for the GRASP groove-interacting residues). (E) Deduced  
 354 evolutionary appearance of GRASP binding by the C-terminus of Golgin-45 as deduced by  
 355 AlphaFold2 modelling of holozoan complexes. See also Figure S3, S4 and Data S1.

356

357 **STAR Methods**

358 **Key Resources Table**

| REAGENT or RESOURCE                                           | SOURCE                                                                                                                             | IDENTIFIER       |
|---------------------------------------------------------------|------------------------------------------------------------------------------------------------------------------------------------|------------------|
| <b>Antibodies</b>                                             |                                                                                                                                    |                  |
| Mouse monoclonal anti-GM130 (clone 35)                        | BD Biosciences                                                                                                                     | Cat# 610823      |
| <b>Bacterial strains</b>                                      |                                                                                                                                    |                  |
| One Shot™ TOP10 Chemically Competent <i>E. coli</i>           | ThermoFisher                                                                                                                       | Cat# C404010     |
| <b>Chemicals</b>                                              |                                                                                                                                    |                  |
| DMSO, Hybri-Max™                                              | Merck Millipore/Sigma-Aldrich                                                                                                      | Cat# D2650       |
| Nocodazole                                                    | Merck Millipore/Sigma-Aldrich                                                                                                      | Cat# M1404       |
| <b>Critical commercial assays</b>                             |                                                                                                                                    |                  |
| mMESSAGE mMACHINE T7 transcription kit                        | Invitrogen                                                                                                                         | Cat# AM1344      |
| NEBuilder HiFi DNA assembly cloning kit                       | NEB                                                                                                                                | Cat# E5520       |
| Q5® High-Fidelity DNA polymerase                              | NEB                                                                                                                                | Cat# M0491       |
| <b>Deposited data</b>                                         |                                                                                                                                    |                  |
| <b>Experimental models: Cell lines</b>                        |                                                                                                                                    |                  |
| Human Umbilical Vein Endothelial Cells (HUVECs) pooled donors | Promocell                                                                                                                          | Cat. No. C-12203 |
| <b>Experimental models: Organisms/strains</b>                 |                                                                                                                                    |                  |
| <i>Paracentrotus lividus</i> – wild type                      | Gulf of Naples, Italy                                                                                                              | N/A              |
| <i>Strongylocentrotus purpuratus</i> – wild type              | California, USA                                                                                                                    | N/A              |
| <i>Ciona robusta</i> – wild type                              | Gulf of Taranto, Italy                                                                                                             | N/A              |
| <i>Branchiostoma lanceolatum</i> – wild type                  | Argelès-sur-mer, France                                                                                                            | N/A              |
| <i>Platynereis dumerilii</i> – wild type                      | Cultured colony (founders from the Gulf of Naples)                                                                                 | N/A              |
| <i>Calloria inconspicua</i> – wild type                       | Karitane Point, New Zealand                                                                                                        | N/A              |
| <i>Clytia hemisphaerica</i> – wild type Z strain              | Cultured colony<br>Leclère et al 2019<br><a href="https://doi.org/10.1038/s41559-019-0833-2">doi.org/10.1038/s41559-019-0833-2</a> | N/A              |
| <i>Symsagittifera roscoffensis</i> – wild type                | Roscoff, Brittany, France                                                                                                          | N/A              |
| <i>Parhyale hawaiiensis</i> – wild type                       | Cultured colony (founders from the John G. Shedd Aquarium; Chicago; USA)                                                           | N/A              |
| <i>Trichoplax adhaerens</i> – wild type                       | Cultured colony (founders from the Red Sea)                                                                                        | N/A              |
| <i>Mnemiopsis leidyi</i> – wild type                          | Kristineberg, Sweden                                                                                                               | N/A              |
| <i>Oscarella carmela</i> – wild type                          | Carmel, California, USA                                                                                                            | N/A              |

|                                                                                                                                                                                                                                                                                              |                                                                                                                                 |                                                                                                 |
|----------------------------------------------------------------------------------------------------------------------------------------------------------------------------------------------------------------------------------------------------------------------------------------------|---------------------------------------------------------------------------------------------------------------------------------|-------------------------------------------------------------------------------------------------|
| <i>Capsaspora owczarzaki</i> – wild type strain                                                                                                                                                                                                                                              | Hertel, L.A., 2002<br><a href="https://doi.org/10.1016/S0020-7519(02)00066-8">https://doi.org/10.1016/S0020-7519(02)00066-8</a> | ATCC30864                                                                                       |
| <b>Oligonucleotides</b>                                                                                                                                                                                                                                                                      |                                                                                                                                 |                                                                                                 |
| Assembly primers for plasmid pCineo_mEGFP_Giant-CT<br><br>Forward1:<br>atacgactcactataggctagcATGGTGAGCAAGGGCGAG<br>Reverse1:<br>acctgatccaccgccCTTGTACAGCTCGTCCATGC<br>Forward2:<br>ctgtacaagggcggtggatcaggtggaggatctACTCCTATCATTGGCTC<br>Reverse2:<br>gaggtaccacgcgtgaatTCATTACTATAGATGGCCC | This paper                                                                                                                      | N/A                                                                                             |
| Assembly primers for plasmid pCineo_GaIT_mCherry<br><br>Forward:<br>ttaatacactcactataggctagcATGAGGCTTCGGAGCCG<br>Reverse:<br>ctctagaggtaccacgcgtgaattcTACTTGTACAGCTCGTCCATGC                                                                                                                 | This paper                                                                                                                      | N/A                                                                                             |
| Assembly primers for plasmid pCineo_mCherry_CAAX<br><br>Forward:<br>ttaatacactcactataggctagcATGGTGAGCAAGGGCGAG<br>Reverse:<br>ctctagaggtaccacgcgtgaattcttacataattacacactttgtctttgactctttttctttttaccCTTGTACAGCTCGTCCATGC                                                                      | This paper                                                                                                                      | N/A                                                                                             |
| <b>Recombinant DNA</b>                                                                                                                                                                                                                                                                       |                                                                                                                                 |                                                                                                 |
| Plasmid: pCineo vector                                                                                                                                                                                                                                                                       | Promega                                                                                                                         | Cat# E1841                                                                                      |
| Plasmid: pCineo_mEGFP_Giant-CT                                                                                                                                                                                                                                                               | This paper                                                                                                                      | N/A                                                                                             |
| Plasmid: pCineo_mCherry_CAAX                                                                                                                                                                                                                                                                 | This paper                                                                                                                      | N/A                                                                                             |
| Plasmid: pCineo_GaIT_mCherry                                                                                                                                                                                                                                                                 | This paper                                                                                                                      | N/A                                                                                             |
| <b>Software and algorithms</b>                                                                                                                                                                                                                                                               |                                                                                                                                 |                                                                                                 |
| ImageJ                                                                                                                                                                                                                                                                                       | Schindelin, J. et al. 2012<br><a href="https://doi.org/10.1038/nmeth.2019">https://doi.org/10.1038/nmeth.2019</a>               | <a href="https://imagej.net/ij/index.html">https://imagej.net/ij/index.html</a>                 |
| Prism v9.4.1                                                                                                                                                                                                                                                                                 | N/A                                                                                                                             | <a href="https://www.graphpad.com/">https://www.graphpad.com/</a>                               |
| BLAST                                                                                                                                                                                                                                                                                        | N/A                                                                                                                             | <a href="https://blast.ncbi.nlm.nih.gov/Blast.cgi">https://blast.ncbi.nlm.nih.gov/Blast.cgi</a> |

|               |                                                                                                                                            |                                                                                                                                                                                               |
|---------------|--------------------------------------------------------------------------------------------------------------------------------------------|-----------------------------------------------------------------------------------------------------------------------------------------------------------------------------------------------|
| CLUSTAL-omega | Sievers, F. et al., 2011<br><a href="https://doi.org/10.1038/msb.2011.75">https://doi.org/10.1038/msb.2011.75</a>                          | <a href="https://www.ebi.ac.uk/Tools/msa/clustalo/">https://www.ebi.ac.uk/Tools/msa/clustalo/</a>                                                                                             |
| AliView       | Larsson, A., 2014<br><a href="https://doi.org/10.1093/bioinformatics/btu531">https://doi.org/10.1093/bioinformatics/btu531</a>             | <a href="https://ormbunkar.se/aliview/">https://ormbunkar.se/aliview/</a>                                                                                                                     |
| JalView       | Waterhouse, A.M. et al., 2009<br><a href="https://doi.org/10.1093/bioinformatics/btp033">https://doi.org/10.1093/bioinformatics/btp033</a> | <a href="https://www.jalview.org/">https://www.jalview.org/</a>                                                                                                                               |
| AlphaFold2    | Jumper, J. et al., 2021 DOI: <a href="https://doi.org/10.1038/s41586-021-03819-2">10.1038/s41586-021-03819-2</a> .                         | <a href="https://www.deepmind.com/open-source/alphafold">https://www.deepmind.com/open-source/alphafold</a>                                                                                   |
| ColabFold     | Mirdita, M. et al., 2022<br><a href="https://doi.org/10.1038/s41592-022-01488-1">https://doi.org/10.1038/s41592-022-01488-1</a>            | <a href="https://colab.research.google.com/github/sokrypton/ColabFold/blob/main/AlphaFold2.ipynb">https://colab.research.google.com/github/sokrypton/ColabFold/blob/main/AlphaFold2.ipynb</a> |
| Chimera       | Pettersen E.F. et. al., 2004<br><a href="https://doi.org/10.1002/jcc.20084">https://doi.org/10.1002/jcc.20084</a>                          | <a href="http://www.cgl.ucsf.edu/chimera/">http://www.cgl.ucsf.edu/chimera/</a>                                                                                                               |
| NEBuilder     | N/A                                                                                                                                        | <a href="https://nebuilder.neb.com/">https://nebuilder.neb.com/</a>                                                                                                                           |

359

## 360 **Method Details**

361 **Complex modelling.** Models of complexes between conspecific GRASP/Golgin-45 pairs  
 362 were built with the Colab implementation of AlphaFold2<sup>77</sup>, using MMseqs2 to generate  
 363 multiple sequences alignments<sup>90</sup>. To obtain reliable predictions of the protein-peptide  
 364 complexes, AlphaFold-Multimer version v2 was used, with 12 recycles for the generation of  
 365 each model<sup>91</sup>. Complexes were built without the use of structural templates and without  
 366 Amber refinement as this step does not introduce substantial improvement, while  
 367 significantly increasing computational time.

368

369 Further information regarding animals and experimental procedures is provided in the  
 370 Supplemental Method details

371

372 **Information about figures.** Whether sponges or ctenophores or placozoans are the sister  
 373 group to all other animals remains an unsettled issue<sup>92-102</sup>; for this reason the holozoan tree  
 374 of life was drawn as a polytomy of these three taxa in the Graphical Abstract and Figures 2  
 375 and 3. The animal silhouettes used in the Graphical Abstract were obtained from the public  
 376 domain (<http://phylopic.org>), when not covered by copyright, or drawn by F.F.

377

378 **Resource availability**

379 *Materials availability*

380 All reagents generated in this study are available from the lead contact upon request.

381 *Data and code availability*

382 All data reported in this paper will be shared by the lead contact upon request.

383 This paper does not report original code.

384

385 **References**

386

- 387 1. Tie, H.C., Ludwig, A., Sandin, S., and Lu, L. (2018). The spatial separation of  
388 processing and transport functions to the interior and periphery of the Golgi stack.  
389 *Elife* 7. 10.7554/eLife.41301.
- 390 2. Cole, N.B., Sciaky, N., Marotta, A., Song, J., and Lippincott-Schwartz, J. (1996).  
391 Golgi dispersal during microtubule disruption: regeneration of Golgi stacks at  
392 peripheral endoplasmic reticulum exit sites. *Molecular biology of the cell* 7, 631-650.
- 393 3. Wei, J.H., and Seemann, J. (2010). Unraveling the Golgi ribbon. *Traffic*  
394 (Copenhagen, Denmark) 11, 1391-1400.
- 395 4. Mazzarello, P., Garbarino, C., and Calligaro, A. (2009). How Camillo Golgi became  
396 "the Golgi". *FEBS Lett* 583, 3732-3737. 10.1016/j.febslet.2009.10.018.
- 397 5. Wei, J.H., and Seemann, J. (2017). Golgi ribbon disassembly during mitosis,  
398 differentiation and disease progression. *Curr Opin Cell Biol* 47, 43-51.  
399 10.1016/j.ceb.2017.03.008.
- 400 6. Gosavi, P., and Gleeson, P.A. (2017). The Function of the Golgi Ribbon Structure -  
401 An Enduring Mystery Unfolds! *Bioessays* 39. 10.1002/bies.201700063.
- 402 7. Makhoul, C., Gosavi, P., and Gleeson, P.A. (2019). Golgi Dynamics: The  
403 Morphology of the Mammalian Golgi Apparatus in Health and Disease. *Frontiers in*  
404 *cell and developmental biology* 7, 112. 10.3389/fcell.2019.00112.
- 405 8. Kulkarni-Gosavi, P., Makhoul, C., and Gleeson, P.A. (2019). Form and function of  
406 the Golgi apparatus: scaffolds, cytoskeleton and signalling. *FEBS Lett* 593, 2289-  
407 2305. 10.1002/1873-3468.13567.
- 408 9. Saraste, J., and Prydz, K. (2019). A New Look at the Functional Organization of the  
409 Golgi Ribbon. *Frontiers in cell and developmental biology* 7, 171.  
410 10.3389/fcell.2019.00171.
- 411 10. Puthenveedu, M.A., Bachert, C., Puri, S., Lanni, F., and Linstedt, A.D. (2006).  
412 GM130 and GRASP65-dependent lateral cisternal fusion allows uniform Golgi-  
413 enzyme distribution. *Nat Cell Biol* 8, 238-248. 10.1038/ncb1366.

- 414 11. Feinstein, T.N., and Linstedt, A.D. (2008). GRASP55 regulates Golgi ribbon  
415 formation. *Molecular biology of the cell* *19*, 2696-2707. 10.1091/mbc.E07-11-1200.
- 416 12. Sengupta, D., Truschel, S., Bachert, C., and Linstedt, A.D. (2009). Organelle tethering  
417 by a homotypic PDZ interaction underlies formation of the Golgi membrane network.  
418 *The Journal of cell biology* *186*, 41-55. 10.1083/jcb.200902110.
- 419 13. Truschel, S.T., Sengupta, D., Foote, A., Heroux, A., Macbeth, M.R., and Linstedt,  
420 A.D. (2011). Structure of the membrane-tethering GRASP domain reveals a unique  
421 PDZ ligand interaction that mediates Golgi biogenesis. *The Journal of biological*  
422 *chemistry* *286*, 20125-20129. 10.1074/jbc.C111.245324.
- 423 14. Grond, R., Veenendaal, T., Duran, J.M., Raote, I., van Es, J.H., Corstjens, S.,  
424 Delfgou, L., El Haddouti, B., Malhotra, V., and Rabouille, C. (2020). The function of  
425 GORASPs in Golgi apparatus organization in vivo. *The Journal of cell biology* *219*.  
426 10.1083/jcb.202004191.
- 427 15. Zhang, Y., and Seemann, J. (2021). Rapid degradation of GRASP55 and GRASP65  
428 reveals their immediate impact on the Golgi structure. *The Journal of cell biology*  
429 *220*. 10.1083/jcb.202007052.
- 430 16. Bachert, C., and Linstedt, A.D. (2010). Dual anchoring of the GRASP membrane  
431 tether promotes trans pairing. *The Journal of biological chemistry* *285*, 16294-16301.  
432 10.1074/jbc.M110.116129.
- 433 17. Heinrich, F., Nanda, H., Goh, H.Z., Bachert, C., Losche, M., and Linstedt, A.D.  
434 (2014). Myristoylation restricts orientation of the GRASP domain on membranes and  
435 promotes membrane tethering. *The Journal of biological chemistry* *289*, 9683-9691.  
436 10.1074/jbc.M113.543561.
- 437 18. Rambourg, A., and Clermont, Y. (1997). Three-dimensional structure of the Golgi  
438 apparatus in mammalian cells. In *The Golgi Apparatus*, E.G. Berger, and J. Roth, eds.  
439 (Birkhäuser, Basel), pp. 37-61. 10.1007/978-3-0348-8876-9\_2.
- 440 19. Eldon, E.D., Montpetit, I.C., Nguyen, T., Decker, G., Valdizan, M.C., Klein, W.H.,  
441 and Brandhorst, B.P. (1990). Localization of the sea urchin Spec3 protein to cilia and  
442 Golgi complexes of embryonic ectoderm cells. *Genes Dev* *4*, 111-122.  
443 10.1101/gad.4.1.111.
- 444 20. Terasaki, M. (2000). Dynamics of the endoplasmic reticulum and golgi apparatus  
445 during early sea urchin development. *Molecular biology of the cell* *11*, 897-914.
- 446 21. Kondylis, V., van Nispen tot Pannerden, H.E., Herpers, B., Friggi-Grelin, F., and  
447 Rabouille, C. (2007). The golgi comprises a paired stack that is separated at G2 by  
448 modulation of the actin cytoskeleton through Abi and Scar/WAVE. *Developmental*  
449 *cell* *12*, 901-915.
- 450 22. Yano, H., Yamamoto-Hino, M., Abe, M., Kuwahara, R., Haraguchi, S., Kusaka, I.,  
451 Awano, W., Kinoshita-Toyoda, A., Toyoda, H., and Goto, S. (2005). Distinct  
452 functional units of the Golgi complex in *Drosophila* cells. *Proceedings of the National*  
453 *Academy of Sciences of the United States of America* *102*, 13467-13472.  
454 10.1073/pnas.0506681102.

- 455 23. Page, K.M., McCormack, J.J., Lopes-da-Silva, M., Patella, F., Harrison-Lavoie, K.,  
456 Burden, J.J., Quah, Y.B., Scaglioni, D., Ferraro, F., and Cutler, D.F. (2022). Structure  
457 modeling hints at a granular organization of the Golgi ribbon. *BMC biology* 20, 111.  
458 10.1186/s12915-022-01305-3.
- 459 24. Ayala, I., Mascanzoni, F., and Colanzi, A. (2020). The Golgi ribbon: mechanisms of  
460 maintenance and disassembly during the cell cycle. *Biochem Soc Trans* 48, 245-256.  
461 10.1042/BST20190646.
- 462 25. Ayala, I., and Colanzi, A. (2022). Structural Organization and Function of the Golgi  
463 Ribbon During Cell Division. *Frontiers in cell and developmental biology* 10, 925228.  
464 10.3389/fcell.2022.925228.
- 465 26. Thyberg, J., and Moskalewski, S. (1985). Microtubules and the organization of the  
466 Golgi complex. *Exp Cell Res* 159, 1-16.
- 467 27. Kiyonari, H., Kaneko, M., Abe, T., Shioi, G., Aizawa, S., Furuta, Y., and Fujimori, T.  
468 (2019). Dynamic organelle localization and cytoskeletal reorganization during  
469 preimplantation mouse embryo development revealed by live imaging of genetically  
470 encoded fluorescent fusion proteins. *Genesis* 57, e23277. 10.1002/dvg.23277.
- 471 28. Lu, Z., Joseph, D., Bugnard, E., Zaal, K.J., and Ralston, E. (2001). Golgi complex  
472 reorganization during muscle differentiation: visualization in living cells and  
473 mechanism. *Molecular biology of the cell* 12, 795-808.
- 474 29. Gunn, P.A., Gliddon, B.L., Londrigan, S.L., Lew, A.M., van Driel, I.R., and Gleeson,  
475 P.A. (2011). The Golgi apparatus in the endomembrane-rich gastric parietal cells exist  
476 as functional stable mini-stacks dispersed throughout the cytoplasm. *Biology of the*  
477 *cell* 103, 559-572. 10.1042/BC20110074.
- 478 30. Koga, D., and Ushiki, T. (2006). Three-dimensional ultrastructure of the Golgi  
479 apparatus in different cells: high-resolution scanning electron microscopy of osmium-  
480 macerated tissues. *Arch Histol Cytol* 69, 357-374. 10.1679/aohc.69.357.
- 481 31. Ramón y Cajal, S. (1903). Sobre la existencia de un aparato tubuliforme en el  
482 protoplasma de las células nerviosas y epiteliales de la lombriz de tierra. *Boletín de la*  
483 *Sociedad Española de Historia Natural*, 395-398.
- 484 32. Perroncito, A. (1910). Contributo allo studio della biologia cellulare – mitocondri,  
485 cromidii e apparato reticolare interno nelle cellule spermatiche. *Memorie della R.*  
486 *Accademia dei Lincei; Classe di Scienze Fisiche, Matematiche e Naturali VIII*, 226-  
487 261.
- 488 33. Mollenhauer, H.H., and Morre, D.J. (1998). The tubular network of the Golgi  
489 apparatus. *Histochem Cell Biol* 109, 533-543. 10.1007/s004180050253.
- 490 34. Meek, G.A., and Bradbury, S. (1963). Localization of thiamine pyrophosphatase  
491 activity in the golgi apparatus of a mollusc, *Helix aspersa*. *The Journal of cell biology*  
492 18, 73-85. 10.1083/jcb.18.1.73.
- 493 35. Sato, M., Saegusa, K., Sato, K., Hara, T., Harada, A., and Sato, K. (2011).  
494 *Caenorhabditis elegans* SNAP-29 is required for organellar integrity of the



- 495 endomembrane system and general exocytosis in intestinal epithelial cells. *Molecular*  
496 *biology of the cell* 22, 2579-2587. 10.1091/mbc.E11-04-0279.
- 497 36. Witte, K., Schuh, A.L., Hegemann, J., Sarkeshik, A., Mayers, J.R., Schwarze, K.,  
498 Yates, J.R., 3rd, Eimer, S., and Audhya, A. (2011). TFG-1 function in protein  
499 secretion and oncogenesis. *Nat Cell Biol* 13, 550-558. 10.1038/ncb2225.
- 500 37. Kuterbach, D.A., and Walcott, B. (1986). Iron-containing cells in the honey-bee (*Apis*  
501 *mellifera*). I. Adult morphology and physiology. *J Exp Biol* 126, 375-387.  
502 10.1242/jeb.126.1.375.
- 503 38. Griffiths, G.W., and Beck, S.D. (1975). Ultrastructure of pea aphid mycetocytes:  
504 evidence for symbiote secretion. *Cell Tissue Res* 159, 351-367. 10.1007/BF00221782.
- 505 39. Rolls, M.M., Marquardt, M.T., Kielian, M., and Machamer, C.E. (1997). Cholesterol-  
506 independent targeting of Golgi membrane proteins in insect cells. *Molecular biology*  
507 *of the cell* 8, 2111-2118. 10.1091/mbc.8.11.2111.
- 508 40. Van-Praët, M. (1985). Nutrition of Sea Anemones. *Advances in Marine Biology* 22,  
509 65-99. [https://doi.org/10.1016/S0065-2881\(08\)60050-4](https://doi.org/10.1016/S0065-2881(08)60050-4).
- 510 41. Sachkova, M.Y., Nordmann, E.L., Soto-Angel, J.J., Meeda, Y., Gorski, B., Naumann,  
511 B., Dondorp, D., Chatzigeorgiou, M., Kittelmann, M., and Burkhardt, P. (2021).  
512 Neuropeptide repertoire and 3D anatomy of the ctenophore nervous system. *Curr Biol*  
513 31, 5274-5285 e5276. 10.1016/j.cub.2021.09.005.
- 514 42. Burkhardt, P., Medhus, A., Digel, L., Naumann, B., Soto-Àngel, J.J., Nordmann, E.-  
515 L., Sachkova, M.Y., and Kittelmann, M. (2022). Syncytial nerve net in a ctenophore  
516 sheds new light on the early evolution of nervous systems. *bioRxiv*,  
517 2022.2008.2014.503905. 10.1101/2022.08.14.503905.
- 518 43. Romanova, D.Y., Varoqueaux, F., Daraspe, J., Nikitin, M.A., Eitel, M., Fasshauer, D.,  
519 and Moroz, L.L. (2021). Hidden cell diversity in Placozoa: ultrastructural insights  
520 from *Hoilungia hongkongensis*. *Cell Tissue Res* 385, 623-637. 10.1007/s00441-021-  
521 03459-y.
- 522 44. Laundon, D., Larson, B.T., McDonald, K., King, N., and Burkhardt, P. (2019). The  
523 architecture of cell differentiation in choanoflagellates and sponge choanocytes. *PLoS*  
524 *biology* 17, e3000226. 10.1371/journal.pbio.3000226.
- 525 45. Burkhardt, P., Stegmann, C.M., Cooper, B., Kloepper, T.H., Imig, C., Varoqueaux, F.,  
526 Wahl, M.C., and Fasshauer, D. (2011). Primordial neurosecretory apparatus identified  
527 in the choanoflagellate *Monosiga brevicollis*. *Proceedings of the National Academy*  
528 *of Sciences of the United States of America* 108, 15264-15269.  
529 10.1073/pnas.1106189108.
- 530 46. Harrison, F.W., and De Vos, L. (1991). *Porifera* (Wiley-Liss).
- 531 47. Miller, P.M., Folkmann, A.W., Maia, A.R., Efimova, N., Efimov, A., and Kaverina, I.  
532 (2009). Golgi-derived CLASP-dependent microtubules control Golgi organization and  
533 polarized trafficking in motile cells. *Nat Cell Biol* 11, 1069-1080. 10.1038/ncb1920.

- 534 48. Yadav, S., Puthenveedu, M.A., and Linstedt, A.D. (2012). Golgin160 recruits the  
535 dynein motor to position the Golgi apparatus. *Developmental cell* 23, 153-165.  
536 10.1016/j.devcel.2012.05.023.
- 537 49. Tang, D., Zhang, X., Huang, S., Yuan, H., Li, J., and Wang, Y. (2016). Mena-  
538 GRASP65 interaction couples actin polymerization to Golgi ribbon linking.  
539 *Molecular biology of the cell* 27, 137-152. 10.1091/mbc.E15-09-0650.
- 540 50. Zilberman, Y., Alieva, N.O., Miserey-Lenkei, S., Lichtenstein, A., Kam, Z., Sabanay,  
541 H., and Bershadsky, A. (2011). Involvement of the Rho-mDia1 pathway in the  
542 regulation of Golgi complex architecture and dynamics. *Molecular biology of the cell*  
543 22, 2900-2911. 10.1091/mbc.E11-01-0007.
- 544 51. Makhoul, C., Gosavi, P., Duffield, R., Delbridge, B., Williamson, N.A., and Gleeson,  
545 P.A. (2019). Intersectin-1 interacts with the golgin GCC88 to couple the actin  
546 network and Golgi architecture. *Molecular biology of the cell* 30, 370-386.  
547 10.1091/mbc.E18-05-0313.
- 548 52. Kage, F., Steffen, A., Ellinger, A., Ranftler, C., Gehre, C., Brakebusch, C., Pavelka,  
549 M., Stradal, T., and Rottner, K. (2017). FMNL2 and -3 regulate Golgi architecture  
550 and anterograde transport downstream of Cdc42. *Sci Rep* 7, 9791. 10.1038/s41598-  
551 017-09952-1.
- 552 53. Gordon, D.E., Bond, L.M., Sahlender, D.A., and Peden, A.A. (2010). A targeted  
553 siRNA screen to identify SNAREs required for constitutive secretion in mammalian  
554 cells. *Traffic (Copenhagen, Denmark)* 11, 1191-1204. 10.1111/j.1600-  
555 0854.2010.01087.x.
- 556 54. Bailey Blackburn, J., Pokrovskaya, I., Fisher, P., Ungar, D., and Lupashin, V.V.  
557 (2016). COG Complex Complexities: Detailed Characterization of a Complete Set of  
558 HEK293T Cells Lacking Individual COG Subunits. *Frontiers in cell and*  
559 *developmental biology* 4, 23. 10.3389/fcell.2016.00023.
- 560 55. Liu, S., and Storrie, B. (2015). How Rab proteins determine Golgi structure.  
561 *International review of cell and molecular biology* 315, 1-22.  
562 10.1016/bs.ircmb.2014.12.002.
- 563 56. Witkos, T.M., and Lowe, M. (2015). The Golgin Family of Coiled-Coil Tethering  
564 Proteins. *Frontiers in cell and developmental biology* 3, 86. 10.3389/fcell.2015.00086.
- 565 57. Short, B., Preisinger, C., Korner, R., Kopajtich, R., Byron, O., and Barr, F.A. (2001).  
566 A GRASP55-rab2 effector complex linking Golgi structure to membrane traffic. *The*  
567 *Journal of cell biology* 155, 877-883. 10.1083/jcb.200108079.
- 568 58. Xiang, Y., and Wang, Y. (2010). GRASP55 and GRASP65 play complementary and  
569 essential roles in Golgi cisternal stacking. *The Journal of cell biology* 188, 237-251.  
570 10.1083/jcb.200907132.
- 571 59. Bekier, M.E., 2nd, Wang, L., Li, J., Huang, H., Tang, D., Zhang, X., and Wang, Y.  
572 (2017). Knockout of the Golgi stacking proteins GRASP55 and GRASP65 impairs  
573 Golgi structure and function. *Molecular biology of the cell* 28, 2833-2842.  
574 10.1091/mbc.E17-02-0112.

- 575 60. Munro, S. (2011). The golgin coiled-coil proteins of the Golgi apparatus. *Cold Spring*  
576 *Harb Perspect Biol* 3. 10.1101/cshperspect.a005256.
- 577 61. Kinseth, M.A., Anjard, C., Fuller, D., Guizzunti, G., Loomis, W.F., and Malhotra, V.  
578 (2007). The Golgi-associated protein GRASP is required for unconventional protein  
579 secretion during development. *Cell* 130, 524-534. 10.1016/j.cell.2007.06.029.
- 580 62. Zhang, X., Wang, L., Lak, B., Li, J., Jokitalo, E., and Wang, Y. (2018). GRASP55  
581 Senses Glucose Deprivation through O-GlcNAcylation to Promote Autophagosome-  
582 Lysosome Fusion. *Developmental cell* 45, 245-261 e246.  
583 10.1016/j.devcel.2018.03.023.
- 584 63. Nuchel, J., Tauber, M., Nolte, J.L., Morgelin, M., Turk, C., Eckes, B., Demetriades,  
585 C., and Plomann, M. (2021). An mTORC1-GRASP55 signaling axis controls  
586 unconventional secretion to reshape the extracellular proteome upon stress. *Mol Cell*  
587 81, 3275-3293 e3212. 10.1016/j.molcel.2021.06.017.
- 588 64. Rabouille, C., and Linstedt, A.D. (2016). GRASP: A Multitasking Tether. *Frontiers in*  
589 *cell and developmental biology* 4, 1. 10.3389/fcell.2016.00001.
- 590 65. Barr, F.A., Puype, M., Vandekerckhove, J., and Warren, G. (1997). GRASP65, a  
591 protein involved in the stacking of Golgi cisternae. *Cell* 91, 253-262.
- 592 66. Shorter, J., Watson, R., Giannakou, M.E., Clarke, M., Warren, G., and Barr, F.A.  
593 (1999). GRASP55, a second mammalian GRASP protein involved in the stacking of  
594 Golgi cisternae in a cell-free system. *The EMBO journal* 18, 4949-4960.  
595 10.1093/emboj/18.18.4949.
- 596 67. Burd, C.G. (2021). GRASPing for consensus about the Golgi apparatus. *The Journal*  
597 *of cell biology* 220. 10.1083/jcb.202103117.
- 598 68. Kuo, A., Zhong, C., Lane, W.S., and Derynck, R. (2000). Transmembrane  
599 transforming growth factor- $\alpha$  tethers to the PDZ domain-containing, Golgi  
600 membrane-associated protein p59/GRASP55. *The EMBO journal* 19, 6427-6439.  
601 10.1093/emboj/19.23.6427.
- 602 69. Barr, F.A., Nakamura, N., and Warren, G. (1998). Mapping the interaction between  
603 GRASP65 and GM130, components of a protein complex involved in the stacking of  
604 Golgi cisternae. *The EMBO journal* 17, 3258-3268. 10.1093/emboj/17.12.3258.
- 605 70. Malsam, J., Satoh, A., Pelletier, L., and Warren, G. (2005). Golgin tethers define  
606 subpopulations of COPI vesicles. *Science (New York, N.Y)* 307, 1095-1098.  
607 10.1126/science.1108061.
- 608 71. Wong, M., and Munro, S. (2014). Membrane trafficking. The specificity of vesicle  
609 traffic to the Golgi is encoded in the golgin coiled-coil proteins. *Science (New York,*  
610 *N.Y)* 346, 1256898. 10.1126/science.1256898.
- 611 72. Wong, M., Gillingham, A.K., and Munro, S. (2017). The golgin coiled-coil proteins  
612 capture different types of transport carriers via distinct N-terminal motifs. *BMC*  
613 *biology* 15, 3. 10.1186/s12915-016-0345-3.

- 614 73. Lowe, M. (2019). The Physiological Functions of the Golgin Vesicle Tethering  
615 Proteins. *Frontiers in cell and developmental biology* 7, 94. 10.3389/fcell.2019.00094.
- 616 74. Barlow, L.D., Nyvltova, E., Aguilar, M., Tachezy, J., and Dacks, J.B. (2018). A  
617 sophisticated, differentiated Golgi in the ancestor of eukaryotes. *BMC biology* 16, 27.  
618 10.1186/s12915-018-0492-9.
- 619 75. Zhao, J., Li, B., Huang, X., Morelli, X., and Shi, N. (2017). Structural Basis for the  
620 Interaction between Golgi Reassembly-stacking Protein GRASP55 and Golgin45. *The*  
621 *Journal of biological chemistry* 292, 2956-2965. 10.1074/jbc.M116.765990.
- 622 76. Jumper, J., Evans, R., Pritzel, A., Green, T., Figurnov, M., Ronneberger, O.,  
623 Tunyasuvunakool, K., Bates, R., Zidek, A., Potapenko, A., et al. (2021). Highly  
624 accurate protein structure prediction with AlphaFold. *Nature* 596, 583-589.  
625 10.1038/s41586-021-03819-2.
- 626 77. Mirdita, M., Schutze, K., Moriwaki, Y., Heo, L., Ovchinnikov, S., and Steinegger, M.  
627 (2022). ColabFold: making protein folding accessible to all. *Nat Methods* 19, 679-  
628 682. 10.1038/s41592-022-01488-1.
- 629 78. Guo, H.B., Perminov, A., Bekele, S., Kedziora, G., Farajollahi, S., Varaljay, V.,  
630 Hinkle, K., Molinero, V., Meister, K., Hung, C., et al. (2022). AlphaFold2 models  
631 indicate that protein sequence determines both structure and dynamics. *Sci Rep* 12,  
632 10696. 10.1038/s41598-022-14382-9.
- 633 79. Tsaban, T., Varga, J.K., Avraham, O., Ben-Aharon, Z., Khramushin, A., and  
634 Schueler-Furman, O. (2022). Harnessing protein folding neural networks for peptide-  
635 protein docking. *Nature communications* 13, 176. 10.1038/s41467-021-27838-9.
- 636 80. Tamarin, A., and Keller, P.J. (1972). An ultrastructural study of the byssal thread  
637 forming system in *Mytilus*. *J Ultrastruct Res* 40, 401-416. 10.1016/s0022-  
638 5320(72)90110-4.
- 639 81. Mendes, L.F.S., Batista, M.R.B., Kava, E., Bleicher, L., Micheletto, M.C., and Costa-  
640 Filho, A.J. (2022). Resurrecting Golgi proteins to grasp Golgi ribbon formation and  
641 self-association under stress. *Int J Biol Macromol* 194, 264-275.  
642 10.1016/j.ijbiomac.2021.11.173.
- 643 82. Ladinsky, M.S., Mastronarde, D.N., McIntosh, J.R., Howell, K.E., and Staehelin, L.A.  
644 (1999). Golgi structure in three dimensions: functional insights from the normal rat  
645 kidney cell. *The Journal of cell biology* 144, 1135-1149.
- 646 83. Cole, N.B.S., C.L.; Sciaky, N.; Terasaki, M.; Edidin, M.; Lippincott-Schwartz, J.  
647 (1996). Diffusional mobility of Golgi proteins in membranes of living cells. *Science*  
648 (New York, N.Y 273, 797-801. 10.1126/science.273.5276.797
- 649 84. Mendes, L.F.S., Fontana, N.A., Reddy, S.T., Uversky, V.N., and Costa-Filho, A.J.  
650 (2020). The exquisite structural biophysics of the Golgi Reassembly and Stacking  
651 Proteins. *Int J Biol Macromol* 164, 3632-3644. 10.1016/j.ijbiomac.2020.08.203.

- 652 85. Knoll, A.H. (2011). The Multiple Origins of Complex Multicellularity. *Annual*  
653 *Review of Earth and Planetary Sciences* 39, 217–239.  
654 10.1146/annurev.earth.031208.100209.
- 655 86. Vildanova, M.S., Wang, W., and Smirnova, E.A. (2014). Specific organization of  
656 Golgi apparatus in plant cells. *Biochemistry (Mosc)* 79, 894-906.  
657 10.1134/S0006297914090065.
- 658 87. Staehelin, L.A., and Kang, B.H. (2008). Nanoscale architecture of endoplasmic  
659 reticulum export sites and of Golgi membranes as determined by electron  
660 tomography. *Plant Physiol* 147, 1454-1468. 10.1104/pp.108.120618.
- 661 88. Bracker, C.E.M., D.J.; Grove, S.N.; (1996). Structure, differentiation, and  
662 multiplication of Golgi apparatus in fungal hyphae. *Protoplasma* 194, 250-274.
- 663 89. Gillingham, A.K., and Munro, S. (2016). Finding the Golgi: Golgin Coiled-Coil  
664 Proteins Show the Way. *Trends Cell Biol* 26, 399-408. 10.1016/j.tcb.2016.02.005.
- 665 90. Steinegger, M., and Soding, J. (2017). MMseqs2 enables sensitive protein sequence  
666 searching for the analysis of massive data sets. *Nature biotechnology* 35, 1026-1028.  
667 10.1038/nbt.3988.
- 668 91. Johansson-Akhe, I., and Wallner, B. (2022). Improving peptide-protein docking with  
669 AlphaFold-Multimer using forced sampling. *Front Bioinform* 2, 959160.  
670 10.3389/fbinf.2022.959160.
- 671 92. Philippe, H., Derelle, R., Lopez, P., Pick, K., Borchiellini, C., Boury-Esnault, N.,  
672 Vacelet, J., Renard, E., Houliston, E., Queinnec, E., et al. (2009). Phylogenomics  
673 revives traditional views on deep animal relationships. *Curr Biol* 19, 706-712.  
674 10.1016/j.cub.2009.02.052.
- 675 93. Pisani, D., Pett, W., Dohrmann, M., Feuda, R., Rota-Stabelli, O., Philippe, H.,  
676 Lartillot, N., and Worheide, G. (2015). Genomic data do not support comb jellies as  
677 the sister group to all other animals. *Proceedings of the National Academy of*  
678 *Sciences of the United States of America* 112, 15402-15407.  
679 10.1073/pnas.1518127112.
- 680 94. Feuda, R., Dohrmann, M., Pett, W., Philippe, H., Rota-Stabelli, O., Lartillot, N.,  
681 Worheide, G., and Pisani, D. (2017). Improved Modeling of Compositional  
682 Heterogeneity Supports Sponges as Sister to All Other Animals. *Curr Biol* 27, 3864-  
683 3870 e3864. 10.1016/j.cub.2017.11.008.
- 684 95. Simion, P., Philippe, H., Baurain, D., Jager, M., Richter, D.J., Di Franco, A., Roure,  
685 B., Satoh, N., Queinnec, E., Ereskovsky, A., et al. (2017). A Large and Consistent  
686 Phylogenomic Dataset Supports Sponges as the Sister Group to All Other Animals.  
687 *Curr Biol* 27, 958-967. 10.1016/j.cub.2017.02.031.
- 688 96. Redmond, A.K., and McLysaght, A. (2021). Evidence for sponges as sister to all other  
689 animals from partitioned phylogenomics with mixture models and recoding. *Nature*  
690 *communications* 12, 1783. 10.1038/s41467-021-22074-7.

- 691 97. Ryan, J.F., Pang, K., Schnitzler, C.E., Nguyen, A.D., Moreland, R.T., Simmons,  
692 D.K., Koch, B.J., Francis, W.R., Havlak, P., Program, N.C.S., et al. (2013). The  
693 genome of the ctenophore *Mnemiopsis leidyi* and its implications for cell type  
694 evolution. *Science (New York, N.Y)* *342*, 1242592. [10.1126/science.1242592](https://doi.org/10.1126/science.1242592).
- 695 98. Moroz, L.L., Kocot, K.M., Citarella, M.R., Dosung, S., Norekian, T.P., Povolotskaya,  
696 I.S., Grigorenko, A.P., Dailey, C., Berezikov, E., Buckley, K.M., et al. (2014). The  
697 ctenophore genome and the evolutionary origins of neural systems. *Nature* *510*, 109-  
698 114. [10.1038/nature13400](https://doi.org/10.1038/nature13400).
- 699 99. Borowiec, M.L., Lee, E.K., Chiu, J.C., and Plachetzki, D.C. (2015). Extracting  
700 phylogenetic signal and accounting for bias in whole-genome data sets supports the  
701 Ctenophora as sister to remaining Metazoa. *BMC Genomics* *16*, 987.  
702 [10.1186/s12864-015-2146-4](https://doi.org/10.1186/s12864-015-2146-4).
- 703 100. Whelan, N.V., Kocot, K.M., Moroz, T.P., Mukherjee, K., Williams, P., Paulay, G.,  
704 Moroz, L.L., and Halanych, K.M. (2017). Ctenophore relationships and their  
705 placement as the sister group to all other animals. *Nat Ecol Evol* *1*, 1737-1746.  
706 [10.1038/s41559-017-0331-3](https://doi.org/10.1038/s41559-017-0331-3).
- 707 101. Laumer, C.E., Fernandez, R., Lemer, S., Combosch, D., Kocot, K.M., Riesgo, A.,  
708 Andrade, S.C.S., Sterrer, W., Sorensen, M.V., and Giribet, G. (2019). Revisiting  
709 metazoan phylogeny with genomic sampling of all phyla. *Proc Biol Sci* *286*,  
710 20190831. [10.1098/rspb.2019.0831](https://doi.org/10.1098/rspb.2019.0831).
- 711 102. Dellaporta, S.L., Xu, A., Sagasser, S., Jakob, W., Moreno, M.A., Buss, L.W., and  
712 Schierwater, B. (2006). Mitochondrial genome of *Trichoplax adhaerens* supports  
713 placozoa as the basal lower metazoan phylum. *Proceedings of the National Academy*  
714 *of Sciences of the United States of America* *103*, 8751-8756.  
715 [10.1073/pnas.0602076103](https://doi.org/10.1073/pnas.0602076103).  
716

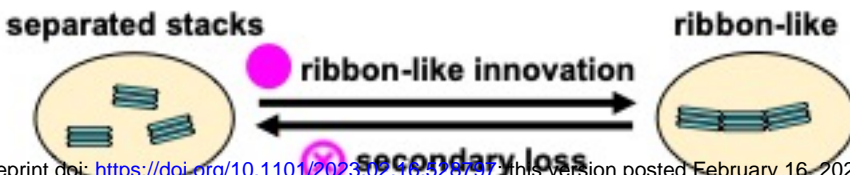

bioRxiv preprint doi: <https://doi.org/10.1101/2023.02.16.528797>; this version posted February 16, 2023. The copyright holder for this preprint (which was not certified by peer review) is the author/funder, who has granted bioRxiv a license to display the preprint in perpetuity. It is made available under aCC-BY-NC-ND 4.0 International license.

**model: molecular drivers of ribbon-like innovation**

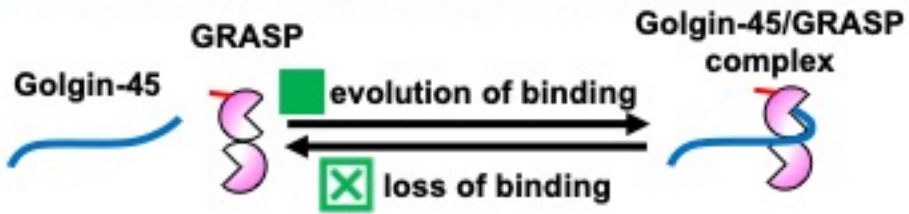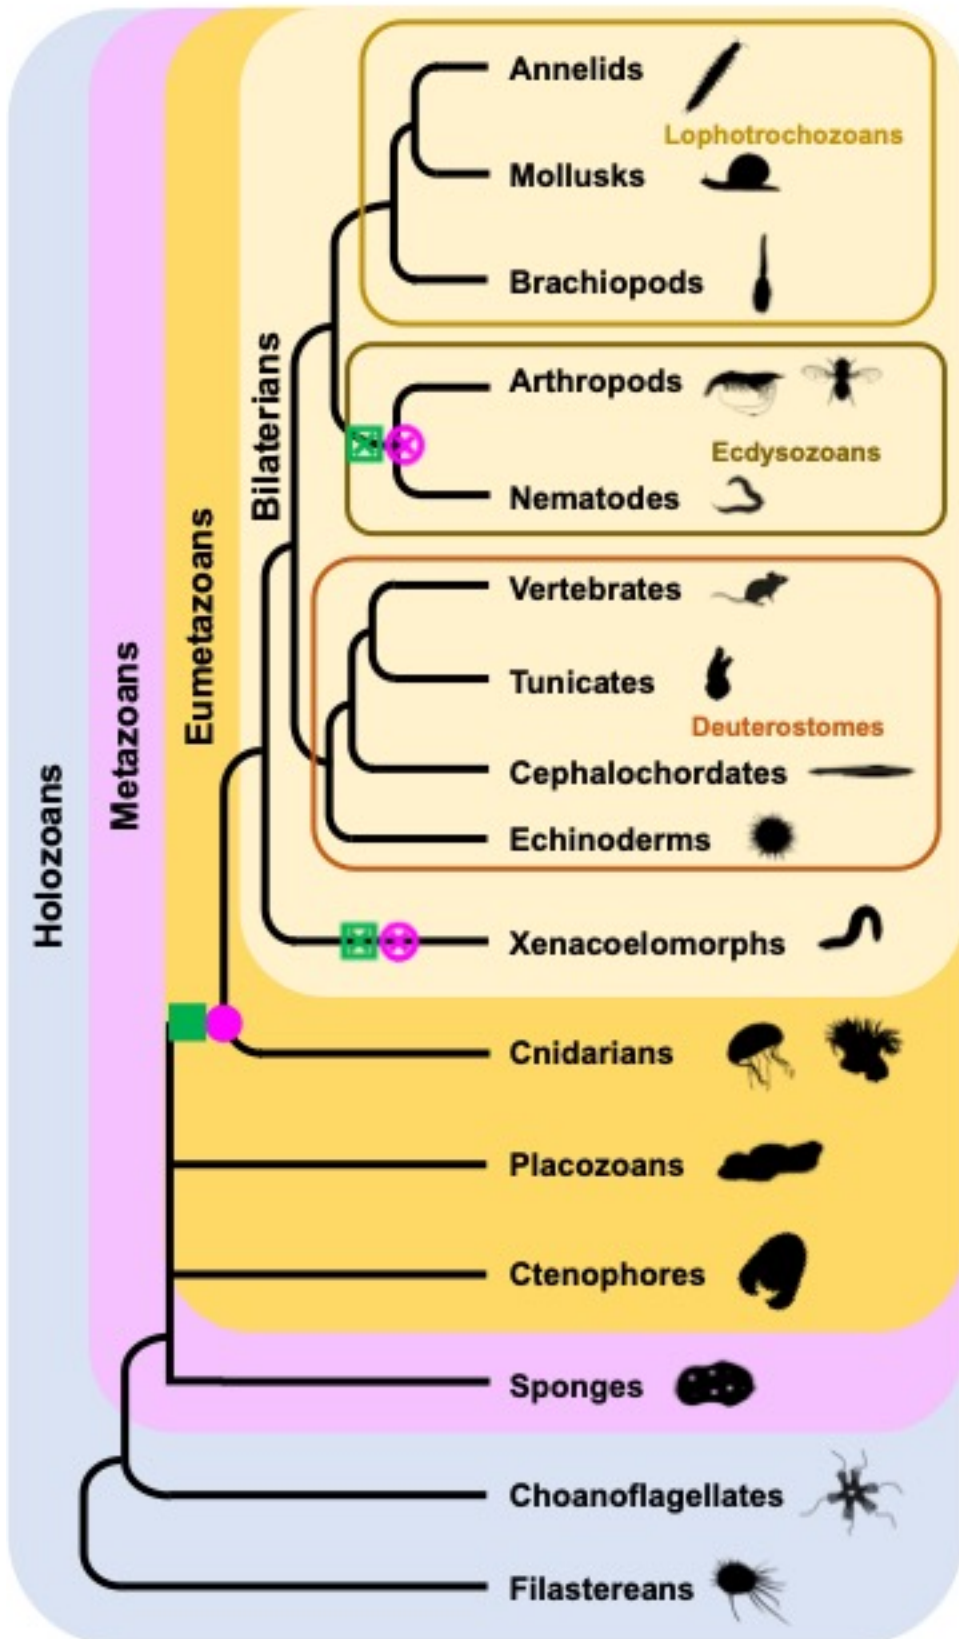

Figure 1

A

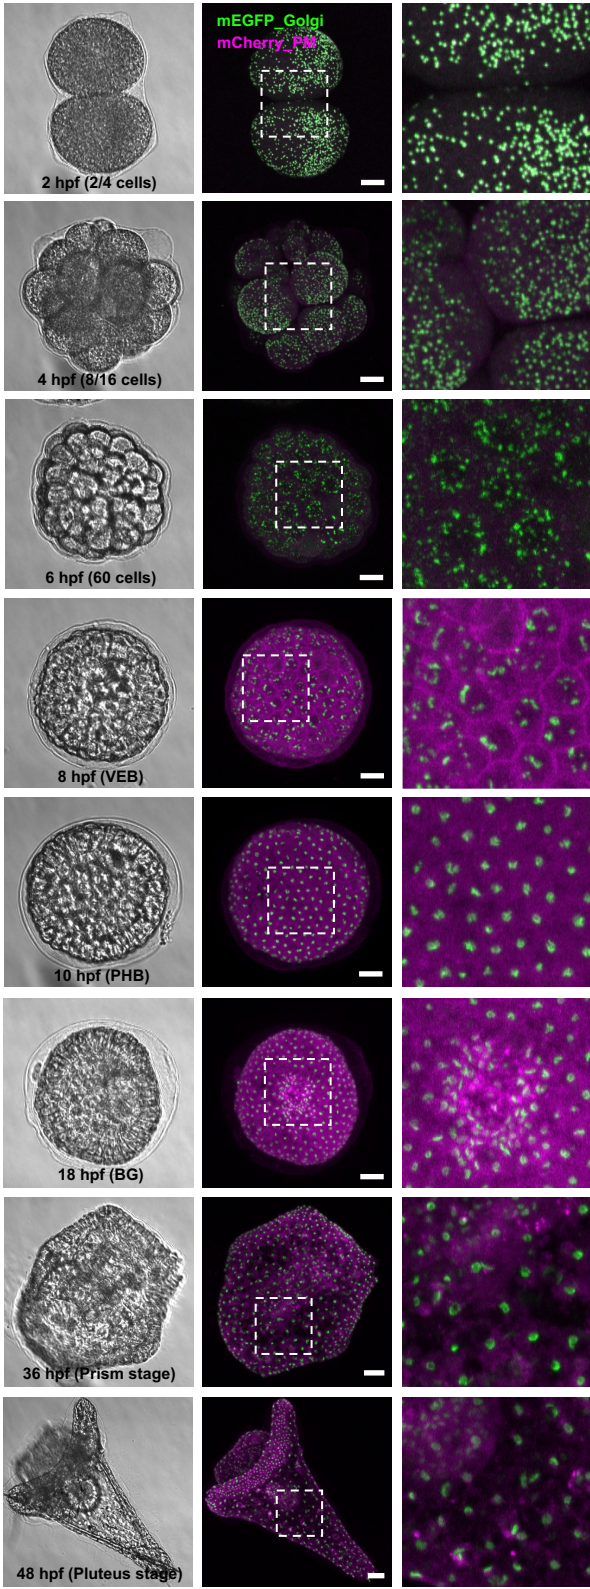

B

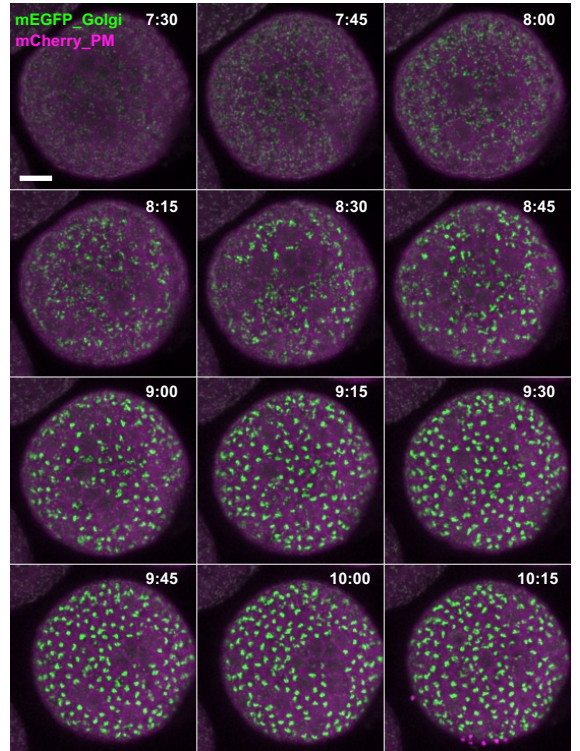

C

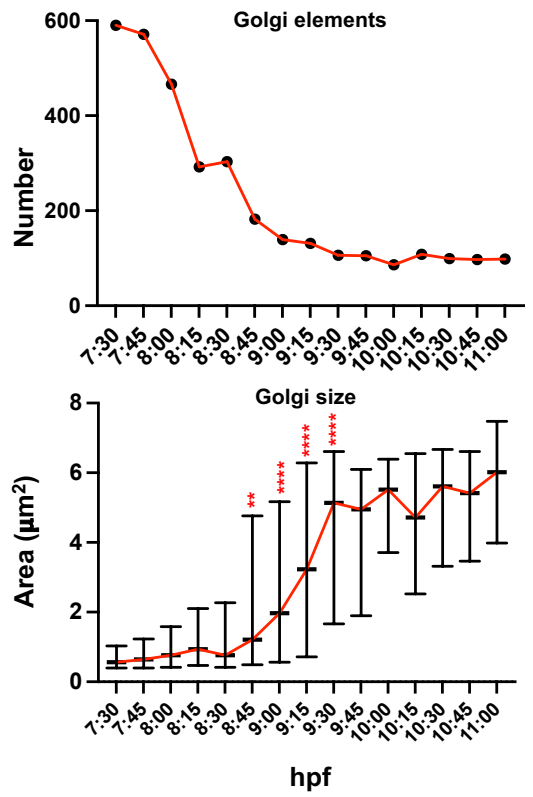

D

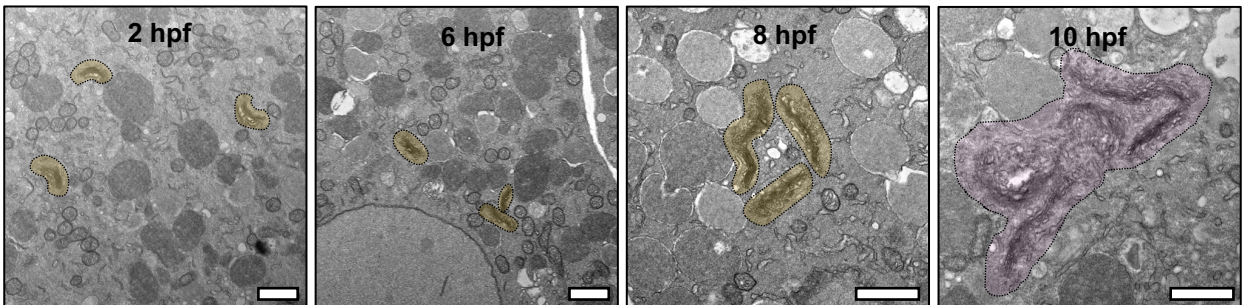

E

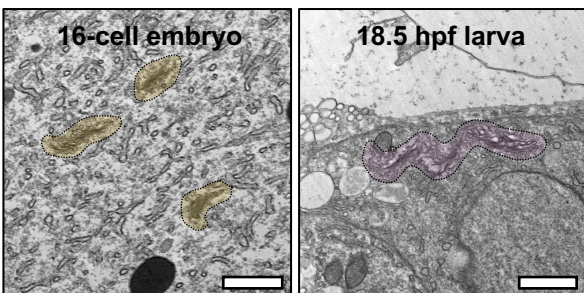

F

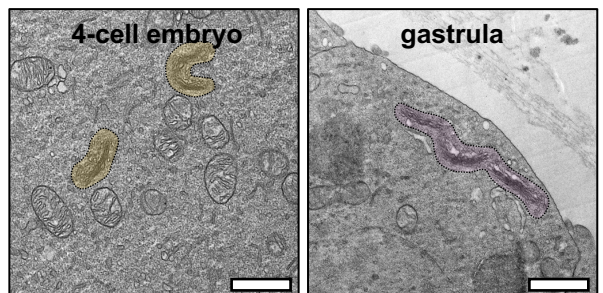



Figure 2

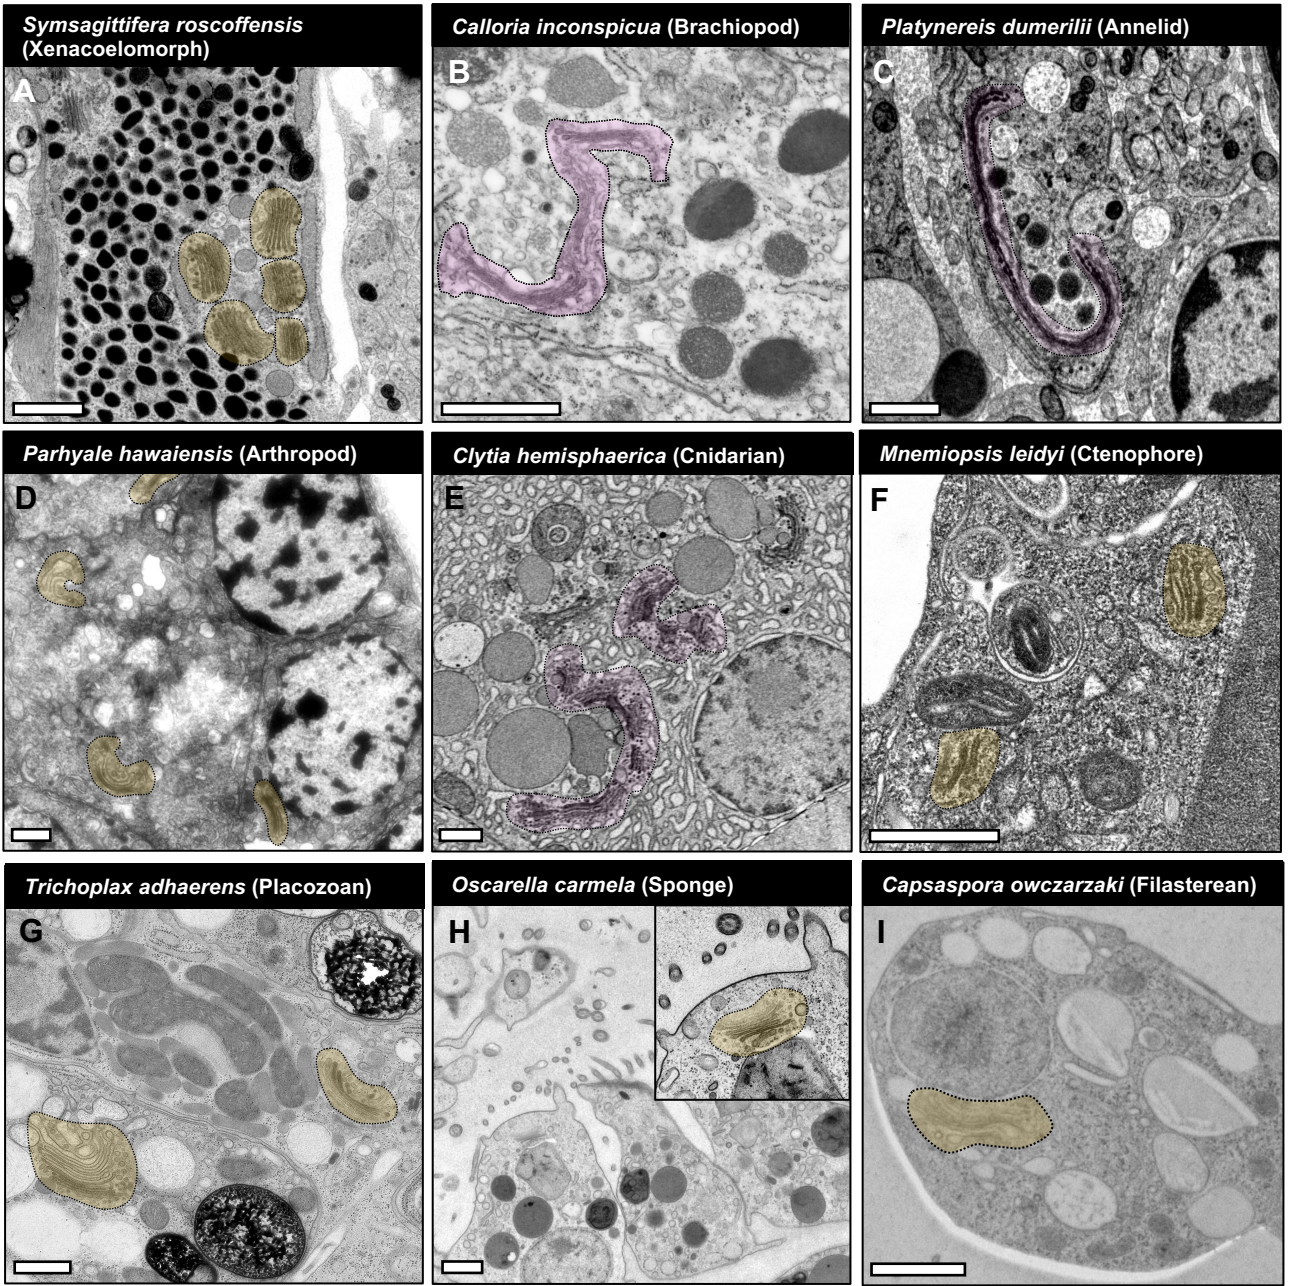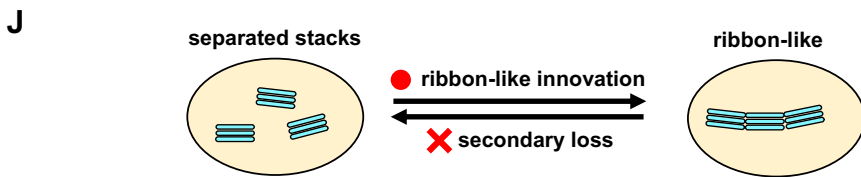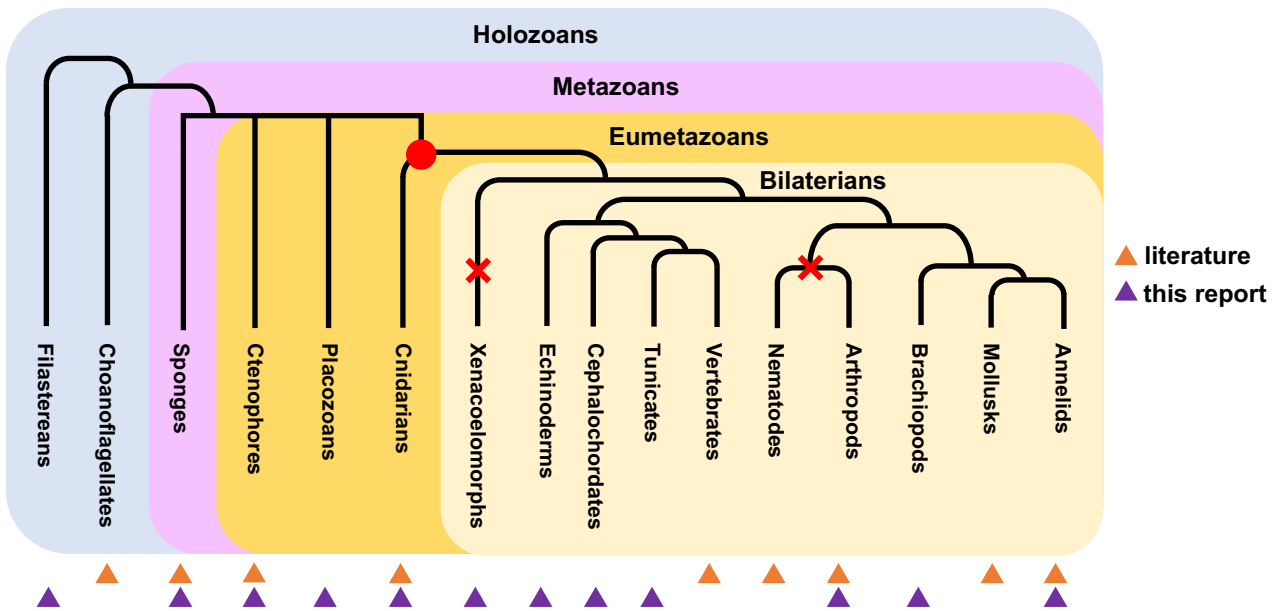

Figure 3

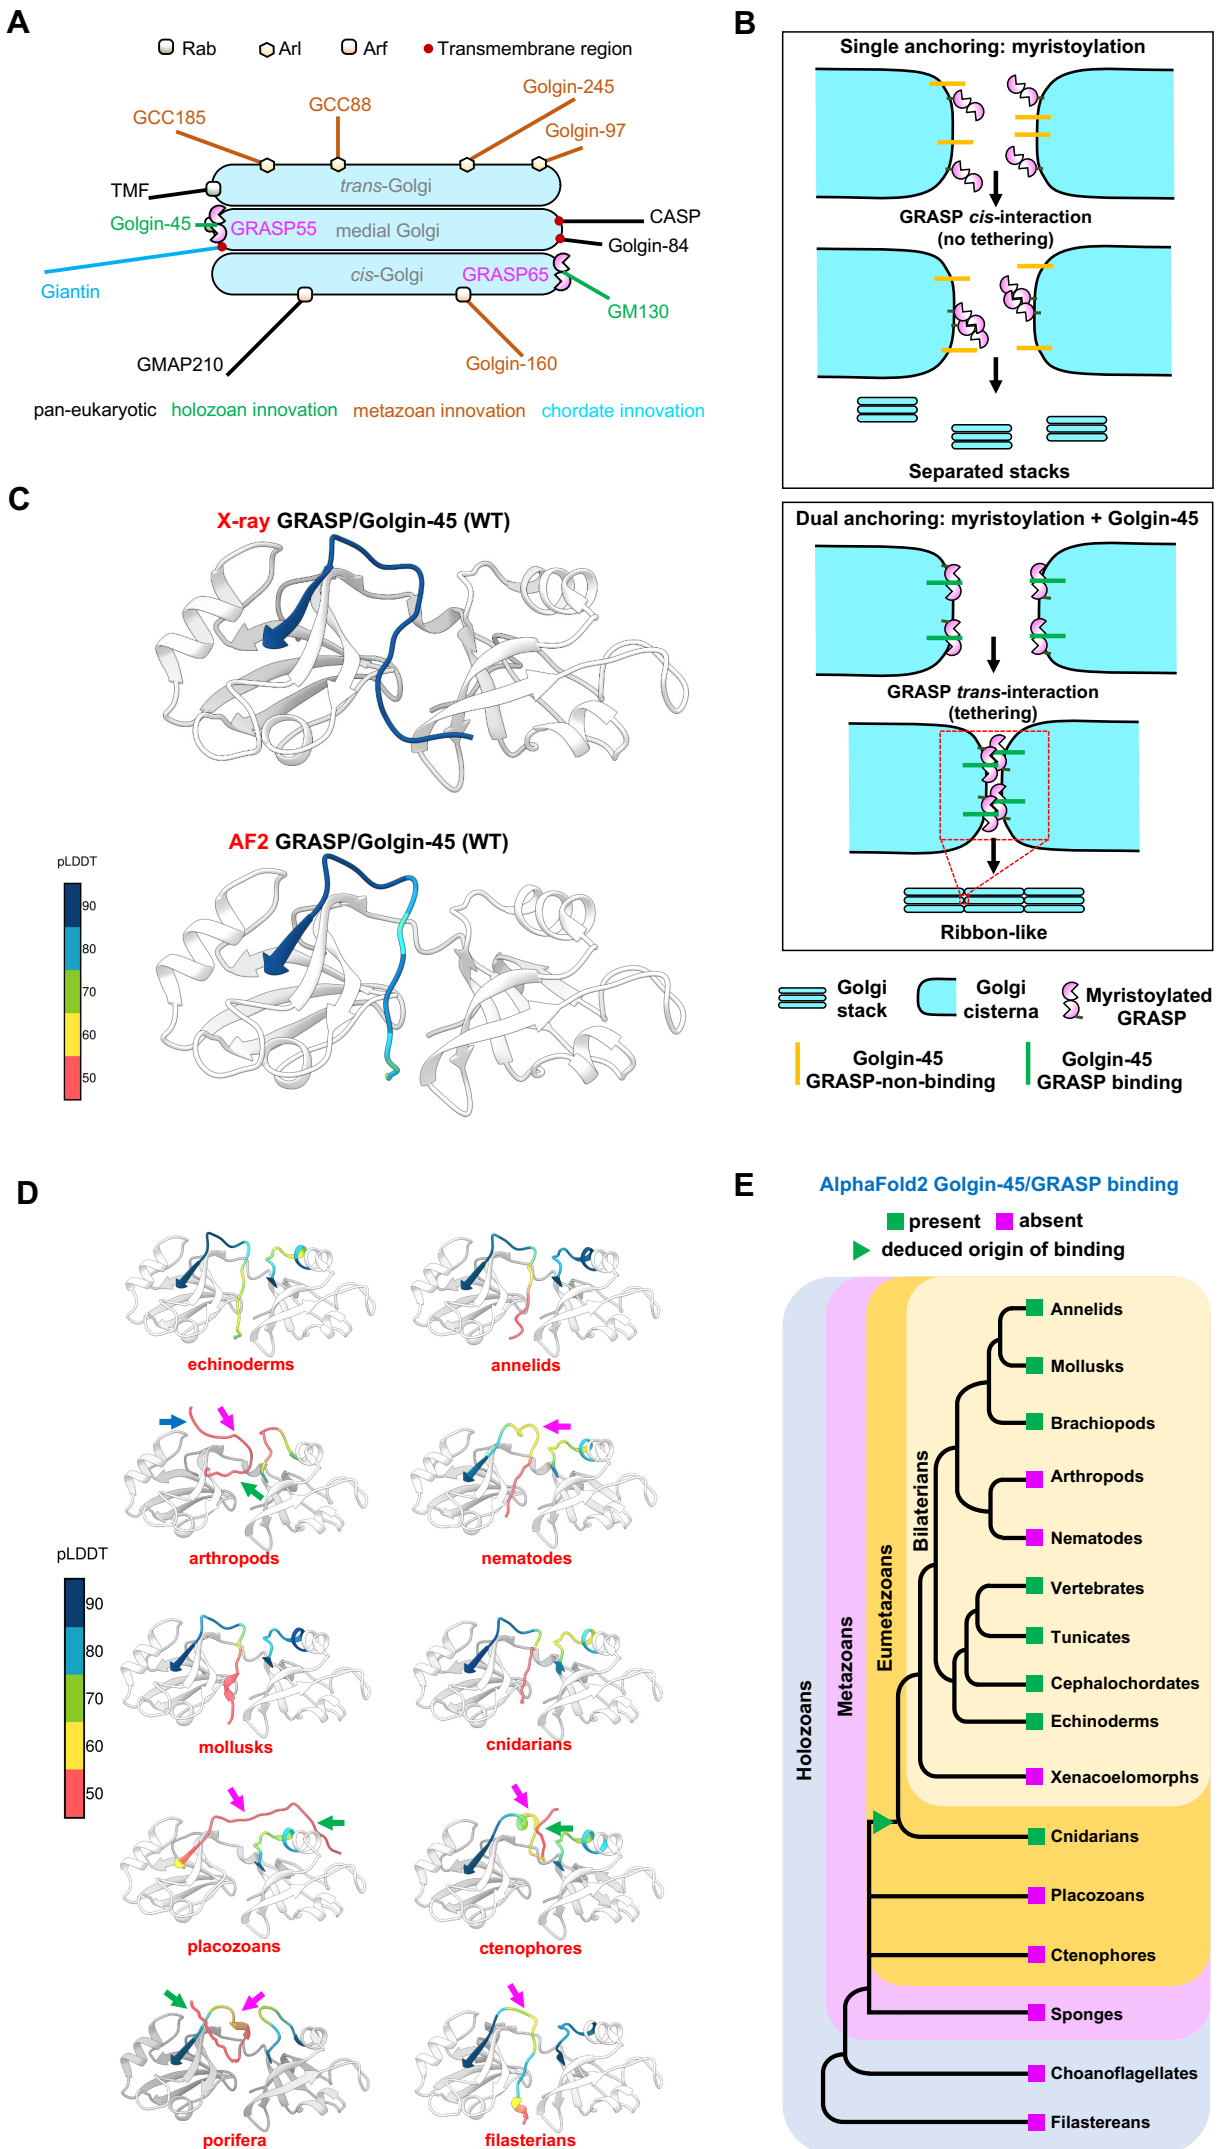

## Supplemental Information

### Evolution of the ribbon-like organization of the Golgi apparatus in animal cells.

#### Authors

Giovanna Benvenuto, Serena Leone, Emanuele Astoricchio, Sophia Bormke, Sanja Jasek, Enrico D'Aniello, Maike Kittelmann, Kent McDonald, Volker Hartenstein, Valentina Baena, Héctor Escrivà, Stephanie Bertrand, Bernd Schierwater, Pawel Burkhardt, Iñaki Ruiz-Trillo, Gáspár Jékely, Jack Ullrich-Lüter, Carsten Lüter, Salvatore D'Aniello, Maria Ina Arnone, Francesco Ferraro

#### Supplemental Method Details

**Experimental organisms.** Animals were either sourced from the wild or lab cultured (see Key Resources table). Animal maintenance and treatments to obtain gametes for *in vitro* fertilization have been previously described<sup>S1-7</sup>. *Parhyale hawaiiensis* embryos were a gift by Michalis Averof (Institut de Génomique Fonctionnelle de Lyon, IGFL). *Symsagittifera roscoffensis* juveniles, cultured at 15°C, were processed within 3 days of hatching. The *Capsaspora owczarzaki* ATCC30864 strain, established in 2002<sup>S8</sup>, was maintained in modified PYNFH medium (ATCC medium 1034) (<https://www.atcc.org/products/327-x>).

**Cells.** Human Umbilical Vein Endothelial Cells (HUVECs), expanded from pools of both sexes acquired from PromoCell, were maintained as described<sup>S9</sup> and used within the 4<sup>th</sup> passage.

**Plasmids.** Primers were designed using the NEBuilder tool (<http://nebuilder.neb.com/>). PCR reactions for amplicon generation were carried out with Q5 High-Fidelity DNA Polymerase (NEB). For primer sequences refer to the Key Resources table (KRT).

pCineo\_mEGFP\_Giant-CT (labelled in the figures as mEGFP\_Golgi). The plasmid encodes mEGFP in frame with a linker sequence (GGGSGGGS) and the 69 C-terminal amino acids of human Giantin for Golgi membrane targeting. The mEGFP coding sequence was amplified from pmEGFP-N1 vector (Clontech) with primers forward 1 (lower case: pCineo sequence; upper case mEGFP coding sequence) and reverse 1 (lower case: GGGG coding sequence; upper case: mEGFP coding sequence). Refer to KRT.

The sequence encoding the 69 C-terminal amino acids of human Giantin was amplified from human umbilical vein endothelial cell (HUVEC) cDNA with primers forward 2 (italics: mEGFP coding sequence; lower case: GGGSGGGS linker coding sequence; upper case: Giantin

coding sequence) and reverse 2 (lower case: pCineo sequence; upper case: Giantin coding sequence and two stop codons). Refer to KRT.

pCineo\_GaIT\_mCherry. A plasmid (the generous gift of Irina Kaverina, Vanderbilt School of Medicine) encoding the N-terminal 87 amino acids of galactosyl-transferase (GaIT), which confer Golgi localization, in frame with mCherry<sup>43</sup> was used as template to amplify the GaIT\_mCherry coding sequence using primers forward (lower case: pCineo sequence; upper case: GaIT coding sequence) and reverse (lower case: pCineo sequence; upper case: GaIT coding sequence). Refer to KRT.

pCineo\_mCherry\_CAAX (labelled in the figures as mCherry\_PM). The sequence encoding mCherry in frame with the polybasic sequence and CAAX motif of human K-Ras (GKKKKKSKTKCVIM) for targeting to the plasma membrane was generated by amplification of mCherry using the pmCherry-N1 (Clontech) plasmid as template and the following primers: forward (lower case: pCineo sequence; upper case: mCherry coding sequence) and reverse (lower case: pCineo sequence; italics: polybasic plus CAAX motif and stop codon coding sequence; upper case: mCherry coding sequence). Refer to KRT.

Amplicons and pCineo plasmid (linearized by NheI/EcoRI digestion) were assembled using the NEBuilder HiFi DNA assembly cloning kit (NEB) following the manufacturer instructions. Correct sequences were verified by Sanger sequencing.

***In vitro* transcription.** Plasmids were linearized by digestion with NotI, a unique restriction site in the pCineo vector located downstream of the cloned sequences. One microgram of each linearized plasmid was used as template for *in vitro* transcription, using the mMACHINE mMACHINE T7 transcription kit (ThermoFisher). Purified mRNAs were resuspended in DEPC-MilliQ water, their concentration measured, and their quality checked by agarose gel electrophoresis. mRNAs were aliquoted and stored at – 80°C until used.

**mRNA microinjections.** Sea urchin eggs' jelly coat was dissolved by a short wash in acidic filtered sea water (1.5 mM citric acid in 0.22 µm filtered sea water, FSW). De-jellied eggs were then immobilized on 60 mm plastic dish lids pre-treated with 1% protamine sulphate (Merck, Sigma-Aldrich, P4380) in FSW. Eggs were then washed with FSW containing sodium para-amino benzoate (Sigma-Aldrich, A6928; 0.05% in FSW) to prevent hardening of the fertilization envelope. *In vitro* transcribed mRNAs were diluted to a final concentration of 300-500 ng/µL in 120 mM KCl/DEPC-water. Four to five pL of diluted mRNAs were injected per embryo, immediately after fertilization. Embryos were allowed to develop at 18°C.

**Confocal microscopy.** *Paracentrotus lividus*. At the indicated times post-fertilization, embryo development was stopped by incubation with 0.2% paraformaldehyde in FSW, which kills the

embryos while preserving mEGFP and mCherry fluorescence. Imaging was carried out within 16 h of formaldehyde treatment. Embryos laid on glass-bottom dishes containing FSW were imaged with an inverted 25x (NA 0.8) water immersion objective, using a Zeiss LSM700 system. Image stacks (z-step 1  $\mu\text{m}$ ) were acquired. Only one third to one half of the embryo volumes could be imaged at early stages, due to the opacity of yolk granules. At later stages (prism and pluteus) embryos were transparent and their whole volume was imaged.

For live imaging experiments, eggs were laid in FWS containing glass-bottom dishes pre-treated with protamine, fertilized, and then immediately microinjected with fluorescent reporter encoding mRNAs. Imaging was carried out as described above. Image stacks (z-step 1  $\mu\text{m}$ ) were acquired at 15 min intervals. Higher magnification imaging of embryos was carried out on mEGFP\_Giant-CT (mEGFP\_Golgi) microinjected embryos using a 40x (NA 1.10) water immersion objective with a Leica SP8 confocal system. For presentation purposes, contrast-enhancement and gaussian-blur filtering were carried out (ImageJ) to the images shown. *HUVECs*. Cells were seeded on gelatin-coated 96-well plates (Nunc surface<sup>®</sup>, NUNC) at 15,000 cells/well and grown in HGM medium for 24 h. After rinsing with fresh medium, cells were fed HGM containing 0.1% (vol:vol) DMSO (control treatment) or 33  $\mu\text{M}$  (10 mg/mL) Nocodazole and incubated for hours before fixation with 4% formaldehyde in phosphate-buffered saline (PBS) for 10 minutes at RT. Fixed cells were permeabilized with 0.2% TX-100 (Merck, Sigma-Aldrich) in PBS for 10 min (RT) and then blocked with 5% BSA (Merck, Sigma-Aldrich) in PBS for 30 min (RT). The Golgi apparatus was immuno-labeled with an antibody raised against the Golgi marker GM130 (BD Biosciences), followed by incubation with Alexa Fluor 488 conjugated anti-mouse antibody (Life Technologies); primary and secondary antibodies were diluted in 1% BSA/0.02% TX-100/PBS. Nuclei were counterstained with Hoechst 33342 (Life Technologies), diluted in PBS, and images acquired using an Opera High Content Screening System (Perkin Elmer) through a 40x air objective (NA 0.6).

**Image analysis.** Golgi objects from confocal images were analyzed with ImageJ (<https://imagej.nih.gov/ij/>). The Golgi channel (8-bit) was selected, maximum intensity projection images generated and processed as follows. Time course (Figure 1A). All images were subjected to background subtraction. Small Golgi objects observed at 2, 4 and 6 hpf were identified with the “find maxima” command and separated from each other by segmentation. The images of all time points were then subjected to thresholding and transformed into binary images. Golgi object number and size were then counted with the “analyze particles” command (area range was set at 0.25 – infinite  $\mu\text{m}^2$ ). Three embryos per time point were analyzed. Time-lapse (Figure 1B). Image threshold was set automatically. At early time points, slight adjustments were done to correctly capture the size of most Golgi objects. For later time points, default threshold values were sufficient to correctly outline the

size Golgi objects. After transformation into binary images, object number and size were measured as described above. Numerical results were processed with Prism (Graphpad) for graph plotting and statistical analysis.

**Electron microscopy.** *Paracentrotus lividus*, *Branchiostoma lanceolatum* and *Ciona robusta* samples, maintained at 18°C, were collected at the indicated developmental stages and fixed at 4°C in 2% glutaraldehyde in filtered sea water (FSW). After fixation samples were first rinsed in FSW (6 x 10 min), then in Milli-Q water (3 x 10 min) and post-fixed with 1% osmium tetroxide and 1.5% potassium ferrocyanide (1 h, 4°C). Samples were then rinsed five times with Milli-Q water, dehydrated in a graded ethanol series, further substituted by propylene oxide and embedded in Epon 812 (TAAB, TAAB Laboratories Equipment Ltd, Berkshire, UK). Resin blocks were sectioned with a Ultracut UCT ultramicrotome (Leica, Vienna, Austria). Sections were placed on nickel grids and observed with a Zeiss LEO 912AB TEM (Zeiss, Oberkochen, Germany).

*Calloria inconspicua*. Three-lobed larvae were initially fixed in 2.5% glutardialdehyde buffered with 0.1 M sodium cacodylate solution (60 min at 5°C). A tiny amount ruthenium red solution was added to stain the extracellular matrix. Repeated rinsing in 0.1 M sodium cacodylate buffer was followed by post-fixation in 1% osmium tetroxide solution buffered with 0.1 M sodium cacodylate (40 min at 4°C). Dehydration with an acetone series and propylene oxide led to embedding in Araldite. Resin blocks were polymerized at 60°C for 48 hours. Ultrathin serial sections (70 nm) were cut on a Reichert Ultracut E microtome, placed on formvar-coated copper slot grids, and automatically stained with uranyl acetate and lead citrate in a LKB Ultrastainer. The sections were examined in Zeiss EM 10B and Zeiss EM 900 transmission electron microscopes.

*Parhyale hawaiiensis*. Embryos were pre-fixed in 2.5% glutardialdehyde, 2% paraformaldehyde, 2% sucrose in sodium cacodylate buffer 0.1 M (SC buffer) overnight at 4°C. After several rinses in SC buffer at room temperature specimens were postfixed in 1% OsO<sub>4</sub> in 0.1 M SC Buffer (2 hrs, room temperature), washed in SC buffer (1 hr) and dehydrated in an ethanol series. Ethanol-preserved specimens were sent to Berlin, transferred to 100% acetone and propylene oxide and subsequently embedded in araldite. Ultrathin sections were cut on a Leica EM UC7, stained with Plano uranyl acetate replacement stain (UAR-EMS) and lead citrate and investigated in a LEO EM 906.

*Strongylocentrotus purpuratus*, *Platynereis dumerilii*, *Mnemiopsis leidyi*, *Oscarella carmela* and *Capsaspora owczarzaki* samples were high-pressure frozen, freeze substituted and processed as described<sup>S7,10-14</sup>.

*Trichoplax adhaerens*. Animals, alive or pre-fixed, were high-pressure frozen/freeze substituted and embedded in Epon. Sections (70 nm) were cut with using a Leica Ultracut UCT ultramicrotome.

*Symsagittifera roscoffensis*. Animals were processed within three days of hatching. The head of a hatchling was processed by high-pressure freezing. Freeze substitution was carried out in a solution of 1% osmium tetroxide and 0.1% uranyl acetate in acetone. A Leica Ultracut UCT was used to generate 60–80 nm sections, which were poststained in a 2% uranyl acetate/lead citrate solution and transferred to formvar-coated slit grids. Sections were imaged with a Tecnai 12 Biotwin TEM, using a fast-scan F214A CCD camera controlled by the SerialEM software (Boulder Lab). Digital image stacks were imported into the TrakEM2 package.

*Clytia hemisphaerica*. Individual ovaries were high-pressure frozen with a Wohlwend Compact 03 high-pressure freezing machine (<http://www.wohlwend-hpf.ch>) using sea water as the freezing medium and then transferred to a frozen solution of 2% osmium in acetone under liquid nitrogen. The ovaries were freeze-substituted in a Leica AFS2 freeze-substitution machine (<https://www.leica-microsystems.com>) using the following program: -90°C for 18 hours, -90°C to -30°C with a slope of 5°C/hour, -30°C for 12 hours, -30°C to 0°C with a slope of 5°C/hour. Samples were removed from the AFS chamber and allowed to reach room temperature. This was followed by 5 acetone washes for 5 minutes each. Ovaries were infiltrated with Polybed resin in a series of steps as follows: 1:3 resin to acetone overnight, 1:1 resin to acetone for 6 hours, 3:1 resin to acetone overnight, 100% resin for 6 hours followed by embedment in molds in fresh 100% resin and curing at 60°C for 2 days. Polymerized samples were then trimmed using an ultramicrotome to get the entire cross-section of the ovary. Serial 60 nm sections were collected using an Automated Tape-Collecting Ultramicrotome, mapped, and imaged with a Zeiss Sigma FE-SEM as described previously<sup>S15</sup>.

**Homology search.** Canonical human GRASP (GRASP65 and GRASP55) and Golgin amino acid sequences (Data S1A) were used as initial queries. Homologs were searched in the target species using Basic Local Alignment Search Tool, BLAST, (BLASTp and TBLASTn) in available databases (Uniprot, NCBI, Ensembl). For specific target species, the search was carried out in dedicated databases (*Amphiura filiformis*: <http://www.echinonet.org.uk/blast/>; *Mnemiopsis leidyi*: <https://research.nhgri.nih.gov/mnemiopsis/sequenceserver/>; *Nematostella vectensis*: <http://marimba.obs-vlfr.fr/blast>; unicellular holozoans: <https://protists.ensembl.org>). Target genomes and, whenever available, transcriptomes were interrogated. Hits with the lowest E-value and highest query coverage were selected as candidate homologs and validated when by reverse BLAST on the human proteome the query was retrieved as the

highest scoring. If this approach did not return a hit, homologs of evolutionarily closer species were used as queries. Further validation of homology was obtained by subjecting the hits to sequence and structural analysis with InterProScan (<https://www.ebi.ac.uk/interpro/search/sequence/>) and by multiple sequence alignment with AliView and JalView to verify regions of sequence similarity.

## Supplemental Results and Discussion

*Interpretation and predictive power of AlphaFold2 models.* The introduction of AlphaFold<sup>S16</sup> and its subsequent evolutions produced a revolution in structural biology, allowing the obtainment of structure models of unprecedented accuracy. Recent benchmark studies have demonstrated that the predictive power of AF2 extends beyond the production of the mere structural models, yielding accurate results also for protein-protein and protein-peptide complexes, even when they imply conformational changes, and providing reliable hints on the effect of missense mutations<sup>S17</sup>. In the case of protein-peptide complexes, models with higher confidence can be obtained by increasing the number of recycles during model generation, provided that a sufficient number of sequences are detected during the generation of the multiple sequence alignments (MSAs)<sup>S18,19</sup>. In general, AF2 predicted models are evaluated and ranked based on a per residue score, the predicted local distance difference test (pLDDT). This value provides a measure, from a minimum of 0 to a maximum of 100, of the agreement between the prediction and experimental structures. Models or regions within them with an average pLDDT  $\geq 70$  are generally considered reliable<sup>S20</sup>. At the same time, it has been observed that low pLDDT values are indicative of intrinsically disordered regions and highly flexible stretches within proteins<sup>S21,22</sup>. Therefore, stable complexes, in which the binding partners have reduced mobility with respect to each other, are typically modelled with higher pLDDT scores. With all these considerations in mind, we built models for representative pairs of Golgin-45/GRASP from different species; the GRASPs from all species were modeled with extremely high confidence (average pLDDT  $\geq 90$ ), whereas variable results were obtained for the C-terminal peptides of the Golgins. In particular, peptides lacking the PDZ-binding motif (e.g., *D. melanogaster*) and/or the cysteines for Zn-finger formation (e.g., *M. leidy*) could not adopt the binding conformation and were associated to very low pLDDT values. In general, lower pLDDT values characterized the residues interacting with the groove. While these scores could partially arise from low sequence coverage in the MSAs, they are also indicative of higher mobility of said regions, i.e., absence of interaction with the groove and, in some cases, complete displacement of the Golgin-45 peptide.

*Role of groove residues in Golgin-45/GRASP interaction.* To validate the structural conclusions derived from the crystal structure of the mouse GRASP domain (of GRASP55) in



complex with the Golgin-45 C-terminus, the authors of that study performed binding assays of protein mutants by pulldown experiments and isothermal titration calorimetry<sup>S23</sup>. Mutation of the last Golgin-45 residue (I403R), which disrupts the PDZ-binding, motif abolished binding to the GRASP domain; this was also the case when the cysteines involved in the Zinc finger formation were mutated (C393A, C3956A)<sup>S23</sup>. These results were correctly reproduced in AF2 models. In fact, as all modeled complexes have identical levels of sequence coverage, pLDDT decreases compared to the reference structure can in this case be ascribed to increased flexibility, decreased interaction, and reduced binding, and the displacement of the Golgin-45 peptide from its binding site is clearly visible in the structures obtained (compare Figure S4B and S4C to S4A). With respect to the interaction with the GRASP groove, the authors of the above study carried out binding assays with two Golgin-45 mutants, F390A and N391A, which did not abolish its interaction with the GRASP domain<sup>S23</sup>. From these results they concluded that the groove-binding residues of Golgin-45 play little or no role in GRASP interaction. However, the mutation of F390, which in the crystal structure is buried in the hydrophobic groove of the GRASP domain, to alanine is too conservative and should not impact groove binding. At the same time, the side chain of N391 in the crystal structure faces outwards from the GRASP groove, therefore also the mutation N391A is expected to have low impact on the interaction (Figure S3D). We modelled F390A and N391A mutations with AlphaFold2, finding, as expected, that they do not significantly alter the conformation of the Golgin-45 C-terminus and of the complex (Figure S4B). We conclude that these mutations are not ideal to assess the role of the interaction with the groove in the overall binding. For instance, replacement of F390 with a charged residue (F390R or F390E), which cannot be accommodated in the hydrophobic GRASP pocket, produced models devoid of the peptide/groove interaction and might be more indicated to experimentally validate the role of this interaction (Figure S4B). Of note, substitution of a charged residue in place of hydrophobic I388 (I388R) while making the region more flexible is still predicted to be able to fit the groove (Figure S4B), suggesting that some of the groove-inserting residues may be less important than others (e.g., F390) for the interaction with the GRASP domain. Although our modeling results may indicate that, at least in deuterostomes (with their highly conserved Golgin-45 and GRASP sequences), the Golgin-45 residues projecting into the GRASP groove increase binding stability, their actual contribution awaits experimental confirmation. Therefore, we considered stable binding between holozoan Golgin-45 and GRASP to occur when in their models both PDZ-binding motif interaction and Zinc finger formation were detected. It is worth noting that the conclusions regarding the appearance of Golgin-45/GRASP during evolution (Figure 3E) would not substantially change even in the case the Golgin-45 groove-interacting residues were shown to be required for GRASP binding (Figure 3D and S4A, green arrow).

## Supplemental Figures

**Figure S1. Golgi dynamics in the sea urchin embryo.** Related to Figure 1. (A) The fluorescent reporter used in this study, mEGFP\_Golgi, co-localizes with the widely used Golgi reporter GalT\_mCherry; scale bar: 20  $\mu\text{m}$ . (B) Quantification of Golgi object size ( $n = 3$  embryos) from the time-course experiment shown in Figure 1A; \*\*\*\*,  $p < 0.0001$  (Mann-Whitney test). (C) Golgi apparatus imaging of a 15 hpf *Paracentrotus lividus* embryo. A single focal plane acquired with a 40x water immersion objective is shown; scale bar: 5  $\mu\text{m}$ . (D) *Paracentrotus lividus* embryos expressing the mEGFP\_Golgi reporter imaged at the indicated stages; scale bar: 50  $\mu\text{m}$ . (E) Observation of three or more stacks in close contact and/or with membrane continuities is the criterion adopted for positive identification of centralized Golgi in electron micrographs. (F) Golgi stacks a, b and c are seen establishing connections across serial sections (numbered in black), of a blastocoel cell of the sea urchin *Strongylocentrotus purpuratus* pluteus; scale bar: 1  $\mu\text{m}$ . (G) Golgi disassembly/reassembly during mitosis in the *Paracentrotus lividus* embryo; image series (left to right, 15 min acquisition interval). Treatment with the microtubule depolymerizing compound nocodazole induces ribbon unlinking into constituent Golgi stacks in human umbilical vein endothelial cells, HUVECs, (H) and sea urchin embryos (I); magnifications of insets are shown; scale bars: 10  $\mu\text{m}$  and 20  $\mu\text{m}$  (HUVECs and sea urchin, respectively).

**Figure S2. Additional examples of Golgi structure in holozoans.** Related to Figure 2. (A) Golgi stack array in secretory cells of *Symsagittifera roscoffensis*. (B) A three-day-old *Platynereis dumerilii* larva. Serial sections (40 nm each), labelled starting from 1, are shown; in the region of interest, separated stacks (labelled a, b, c and d) in section 1 are seen to merge (c + d and then b + c + d) into a ribbon while progressing through the sections. (C) and (D) Two *Trichoplax adhaerens* cell types. (E) Comb cells of *Mnemiopsis leidyi*. Scale bars: 1  $\mu\text{m}$ . (F) Table summarizing Golgi organization in species and cell types discussed in this report.

**Figure S3. Structural features of holozoan GRASP and Golgin-45 proteins.** Related to Figure 3. (A) Cartoon of domain structure of mammalian GRASPs. The evolutionarily conserved GRASP domain is formed by a tandem of atypical PDZ domains, followed by a C-terminal region, which in mammals is serine/proline-rich (SPR) and whose post-translational modifications modulate GRASP activity. (B) Size, in amino acids, of the GRASP domains and C-terminal regions of the holozoan GRASP sequences (Data S1A) were plotted; bars indicate median size. (C) Pairwise amino acid identity of holozoan GRASP domains plotted as a heat map. Vertebrate duplication into GRASP55 and GRASP65 paralogs occurred with the evolution of jawed vertebrates. In vertebrates, GRASP55 paralogs (green outlines) are more

similar to bilaterian single GRASPs than GRASP65 paralogs (red outlines); percent identity values for pairwise comparisons were obtained with CLUSTAL omega. (D) Structure of the GRASP domain (gold) of mouse GRASP55 in complex with the C-terminal residues of mouse Golgin-45 (ball and stick); PDB accession number 5H3J. PDZ1 and PDZ2 are indicated by color coded circles. Golgin-45 residues important for the interaction are highlighted; green, the stretch of residues interacting with the groove formed by PDZ1 and PDZ2 domains (arrows indicate F390 and N391, which are discussed in supplementary results and discussion and Figure S4); magenta, the two cysteines involved in Zinc-like finger formation; light blue, the PDZ-binding motif. (E) Multiple sequence alignment of the C-termini of the holozoan Golgin-45 homologs. The residues corresponding to the binding features are color coded as in S3D. Insertions (maroon highlight) and deletions (dashed boxes) are indicated relative to the mouse sequence; variations mostly affect the groove-binding sequence.

**Figure S4. Additional AlphaFold2 models.** Related to Figure 3. (A) Model of Golgin-45/GRASP complex in the only xenacoelomorph species with a Golgin-45 gene (Data S1B). (B) Models of mouse Golgin-45 mutants in complex with mouse GRASP domain; color-coded arrows indicate altered binding features as detailed in Figure 3D.

**Supplemental video S1. Golgi clustering in the sea urchin embryo.** Related to Figure 1. Time-lapse microscopy of Golgi element dynamics in a *Paracentrotus lividus* (shown as image series in Figure 1B). Maximum intensity projection of image stacks acquired at 15 min intervals between 7h:30m and 10h:15m post-fertilization are shown.

**Supplemental video S2. Golgi ribbon in a glial cell of the three-day-old *Platynereis dumerilii* larva.** Related to Figure 2. Image stack encompassing the image shown in Figure 2H.

**Data S1. Holozoan GRASP and Golgin-45 homologs.** Related to Figure 3. (A) GRASP homologs. GRASP domains, defined as residues number 1 to the fifth following the invariant motif His-Arg-Iso-Pro at the end of the second PDZ domain, are highlighted in bold; the conserved glycine residues in position 2 are highlighted in red. (B) Golgin-45 homologs. InterProScan analysis identified all the sequences as Golgin-45/BLZF1-like. In xenacoelomorphs, a Golgin-45 homolog was found only in *Hofstenia miamia*.

### Supplemental References

- S1. Paganos, P., Caccavale, F., La Vecchia, C., D'Aniello, E., D'Aniello, S., and Arnone, M.I. (2022). FISH for All: A Fast and Efficient Fluorescent In situ Hybridization

- (FISH) Protocol for Marine Embryos and Larvae. *Front Physiol* 13, 878062. 10.3389/fphys.2022.878062.
- S2. Reed, C.G. (1987). Reproduction and development of marine invertebrates of the northern Pacific coast. Phylum Brachiopoda. (University of Washington Press), 486–493.
- S3. Nislow, C. (1994). Reproduction and development of marine invertebrates. Cellular dynamics during the early development of an articulate brachiopod. (Johns Hopkins University Press, ), 118-128.
- S4. Schierwater, B. (2005). My favorite animal, *Trichoplax adhaerens*. *Bioessays* 27, 1294-1302. 10.1002/bies.20320.
- S5. Browne, W.E., Price, A.L., Gerberding, M., and Patel, N.H. (2005). Stages of embryonic development in the amphipod crustacean, *Parhyale hawaiiensis*. *Genesis* 42, 124-149. 10.1002/gene.20145.
- S6. Leclere, L., Horin, C., Chevalier, S., Lapebie, P., Dru, P., Peron, S., Jager, M., Condamine, T., Pottin, K., Romano, S., et al. (2019). The genome of the jellyfish *Clytia hemisphaerica* and the evolution of the cnidarian life-cycle. *Nat Ecol Evol* 3, 801-810. 10.1038/s41559-019-0833-2.
- S7. Sachkova, M.Y., Nordmann, E.L., Soto-Angel, J.J., Meeda, Y., Gorski, B., Naumann, B., Dondorp, D., Chatzigeorgiou, M., Kittelmann, M., and Burkhardt, P. (2021). Neuropeptide repertoire and 3D anatomy of the ctenophore nervous system. *Curr Biol* 31, 5274-5285 e5276. 10.1016/j.cub.2021.09.005.
- S8. Hertel, L.A., Bayne, C.J., and Loker, E.S. (2002). The symbiont *Capsaspora owczarzaki*, nov. gen. nov. sp., isolated from three strains of the pulmonate snail *Biomphalaria glabrata* is related to members of the Mesomycetozoa. *Int J Parasitol* 32, 1183-1191. 10.1016/s0020-7519(02)00066-8.
- S9. Ferraro, F., Patella, F., Costa, J.R., Ketteler, R., Kriston-Vizi, J., and Cutler, D.F. (2020). Modulation of endothelial organelle size as an antithrombotic strategy. *J Thromb Haemost.* 10.1111/jth.15084.
- S10. Paganos, P., Ronchi, P., Carl, J., Mizzon, G., Martinez, P., Benvenuto, G., and Arnone, M.I. (2022). Integrating single cell transcriptomics and volume electron microscopy confirms the presence of pancreatic acinar-like cells in sea urchins. *Frontiers in cell and developmental biology* 10, 991664. 10.3389/fcell.2022.991664.
- S11. Sebe-Pedros, A., Irimia, M., Del Campo, J., Parra-Acero, H., Russ, C., Nusbaum, C., Blencowe, B.J., and Ruiz-Trillo, I. (2013). Regulated aggregative multicellularity in a close unicellular relative of metazoa. *Elife* 2, e01287. 10.7554/eLife.01287.
- S12. Verasztó, C., Jasek, S., Gühmann, M., Shahidi, R., Ueda, N., Beard, J.D., Mendes, S., Heinz, K., Bezares-Calderón, L.A., Williams, E., and Jékely, G. (2020). Whole-animal connectome and cell-type complement of the three-segmented *Platynereis dumerilii* larva. *bioRxiv*. <https://doi.org/10.1101/2020.08.21.260984>

- S13. Laundon, D., Larson, B.T., McDonald, K., King, N., and Burkhardt, P. (2019). The architecture of cell differentiation in choanoflagellates and sponge choanocytes. *PLoS biology* 17, e3000226. 10.1371/journal.pbio.3000226.
- S14. Burkhardt, P., Medhus, A., Digel, L., Naumann, B., Soto-Ángel, J.J., Nordmann, E.-L., Sachkova, M.Y., and Kittelmann, M. (2022). Syncytial nerve net in a ctenophore sheds new light on the early evolution of nervous systems. *bioRxiv*, 2022.2008.2014.503905. 10.1101/2022.08.14.503905.
- S15. Baena, V., Schalek, R.L., Lichtman, J.W., and Terasaki, M. (2019). Serial-section electron microscopy using automated tape-collecting ultramicrotome (ATUM). *Methods in cell biology* 152, 41-67. 10.1016/bs.mcb.2019.04.004.
- S16. Jumper, J., Evans, R., Pritzel, A., Green, T., Figurnov, M., Ronneberger, O., Tunyasuvunakool, K., Bates, R., Zidek, A., Potapenko, A., et al. (2021). Highly accurate protein structure prediction with AlphaFold. *Nature* 596, 583-589. 10.1038/s41586-021-03819-2.
- S17. Akdel, M., Pires, D.E.V., Pardo, E.P., Janes, J., Zalevsky, A.O., Meszaros, B., Bryant, P., Good, L.L., Laskowski, R.A., Pozzati, G., et al. (2022). A structural biology community assessment of AlphaFold2 applications. *Nat Struct Mol Biol* 29, 1056-1067. 10.1038/s41594-022-00849-w.
- S18. Tsaban, T., Varga, J.K., Avraham, O., Ben-Aharon, Z., Khramushin, A., and Schueler-Furman, O. (2022). Harnessing protein folding neural networks for peptide-protein docking. *Nature communications* 13, 176. 10.1038/s41467-021-27838-9.
- S19. Johansson-Akhe, I., and Wallner, B. (2022). Improving peptide-protein docking with AlphaFold-Multimer using forced sampling. *Front Bioinform* 2, 959160. 10.3389/fbinf.2022.959160.
- S20. Tunyasuvunakool, K., Adler, J., Wu, Z., Green, T., Zielinski, M., Zidek, A., Bridgland, A., Cowie, A., Meyer, C., Laydon, A., et al. (2021). Highly accurate protein structure prediction for the human proteome. *Nature* 596, 590-596. 10.1038/s41586-021-03828-1.
- S21. Guo, H.B., Perminov, A., Bekele, S., Kedziora, G., Farajollahi, S., Varaljay, V., Hinkle, K., Molinero, V., Meister, K., Hung, C., et al. (2022). AlphaFold2 models indicate that protein sequence determines both structure and dynamics. *Sci Rep* 12, 10696. 10.1038/s41598-022-14382-9.
- S22. Ruff, K.M., and Pappu, R.V. (2021). AlphaFold and Implications for Intrinsically Disordered Proteins. *Journal of molecular biology* 433, 167208. 10.1016/j.jmb.2021.167208.
- S23. Zhao, J., Li, B., Huang, X., Morelli, X., and Shi, N. (2017). Structural Basis for the Interaction between Golgi Reassembly-stacking Protein GRASP55 and Golgin45. *The Journal of biological chemistry* 292, 2956-2965. 10.1074/jbc.M116.765990.

Figure S1

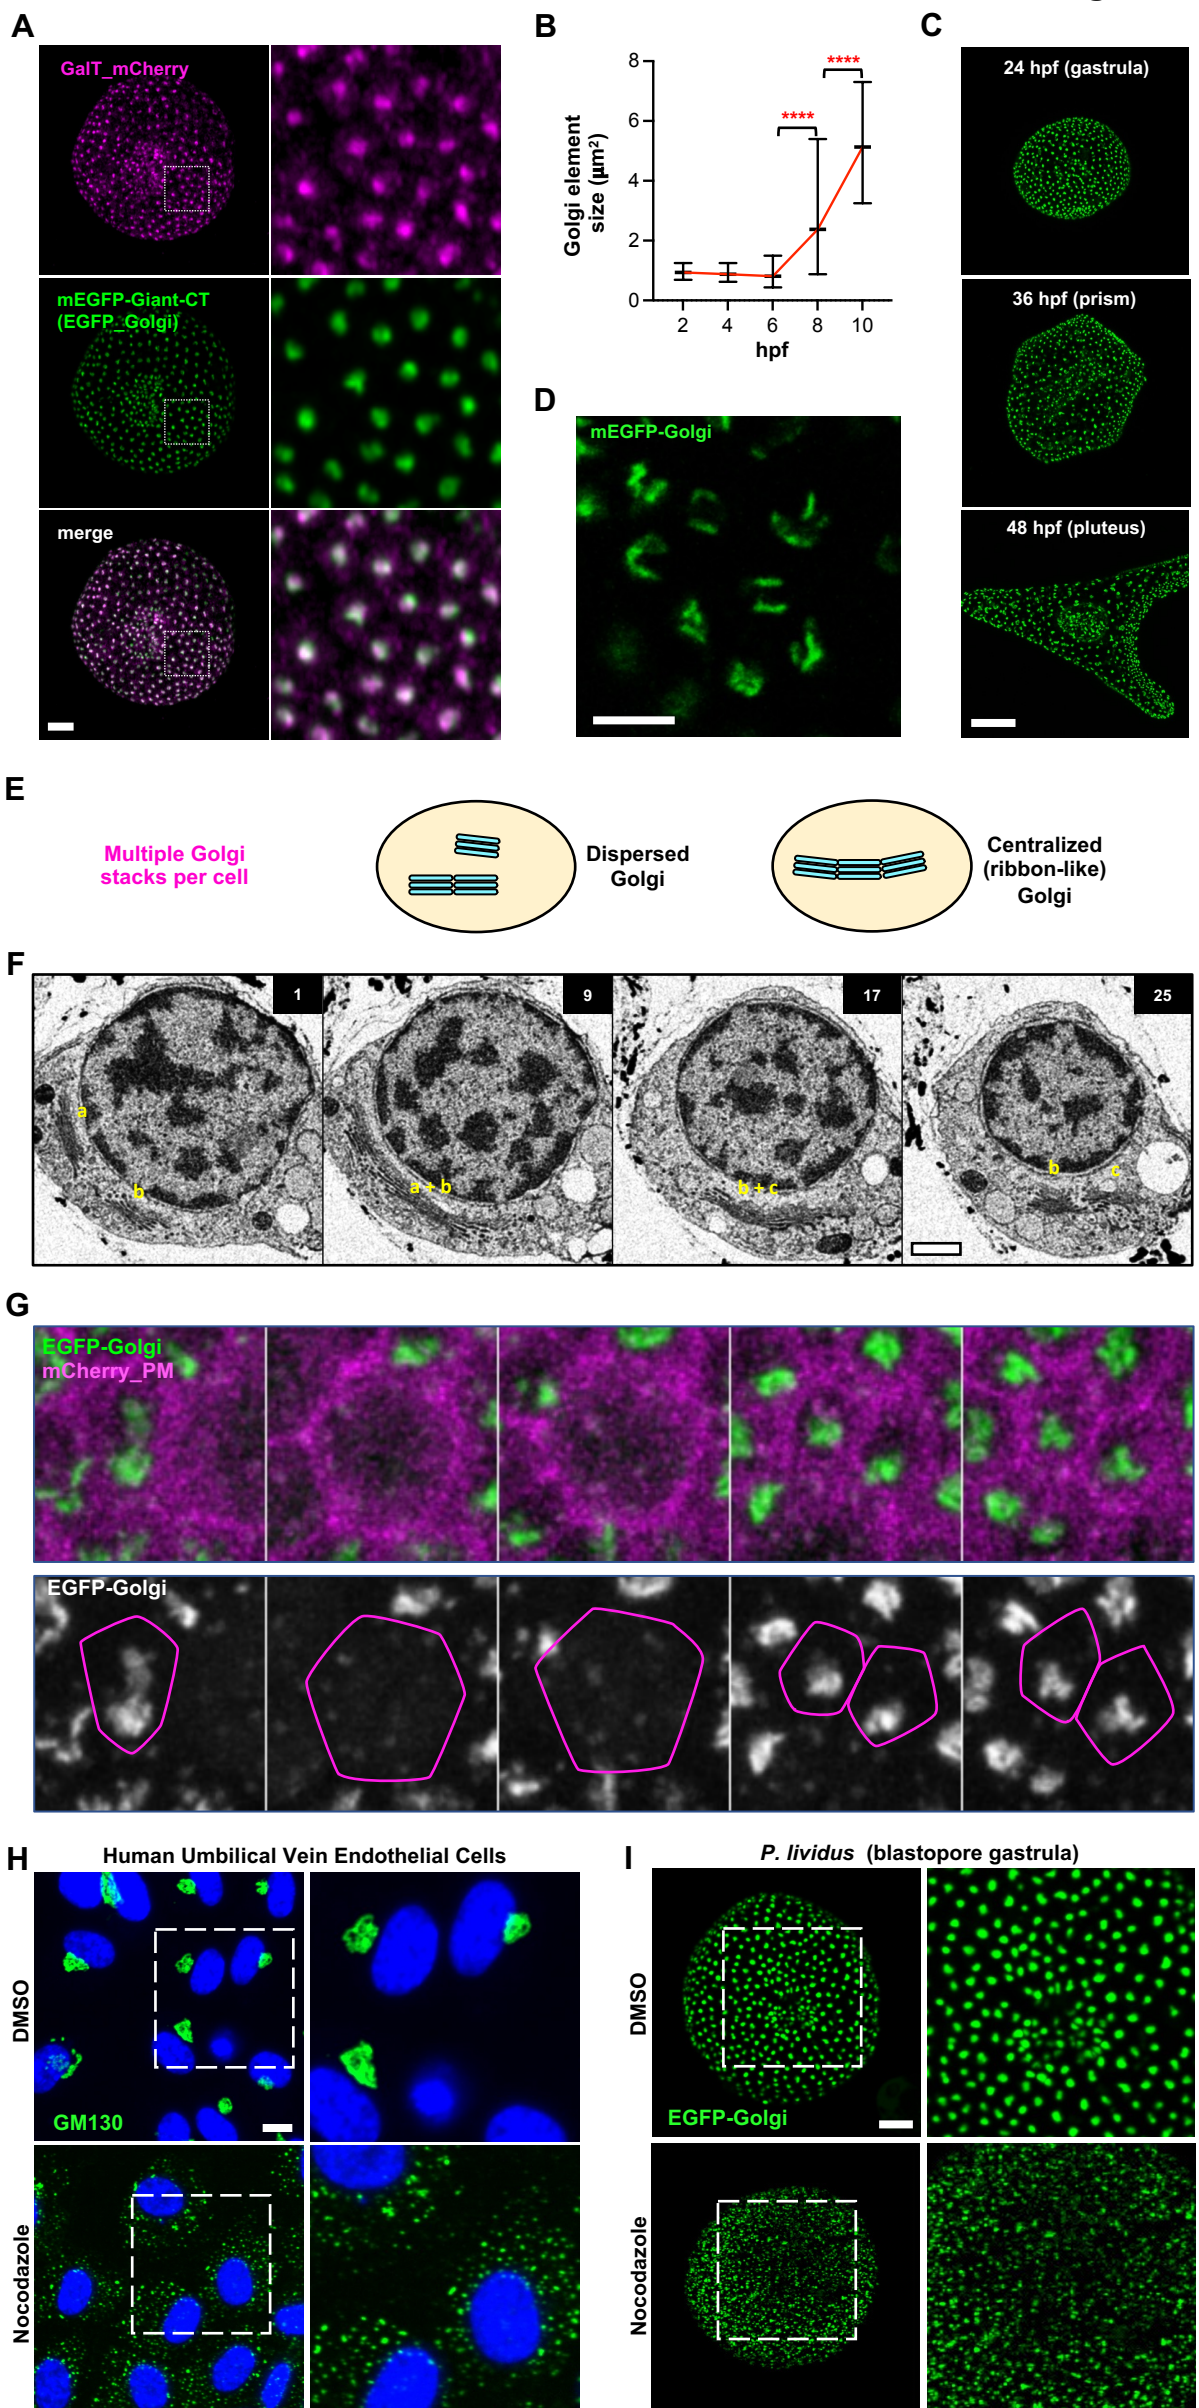

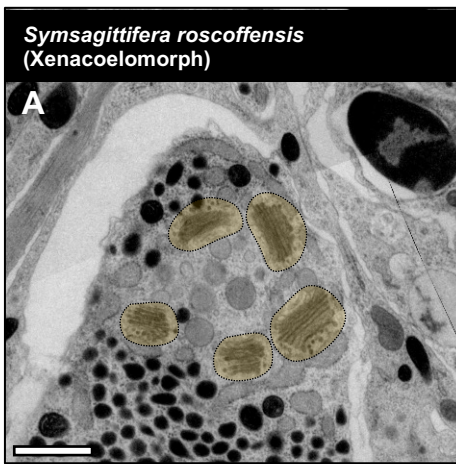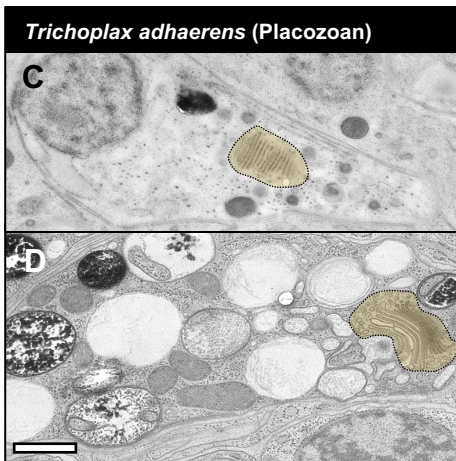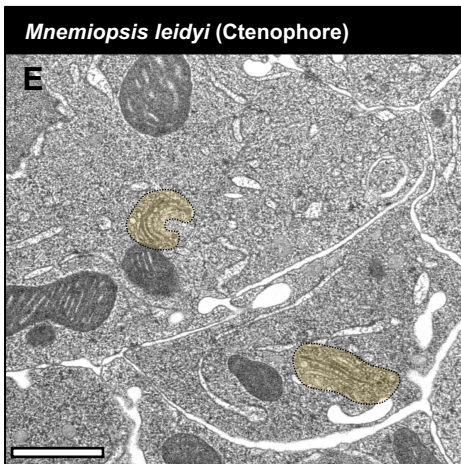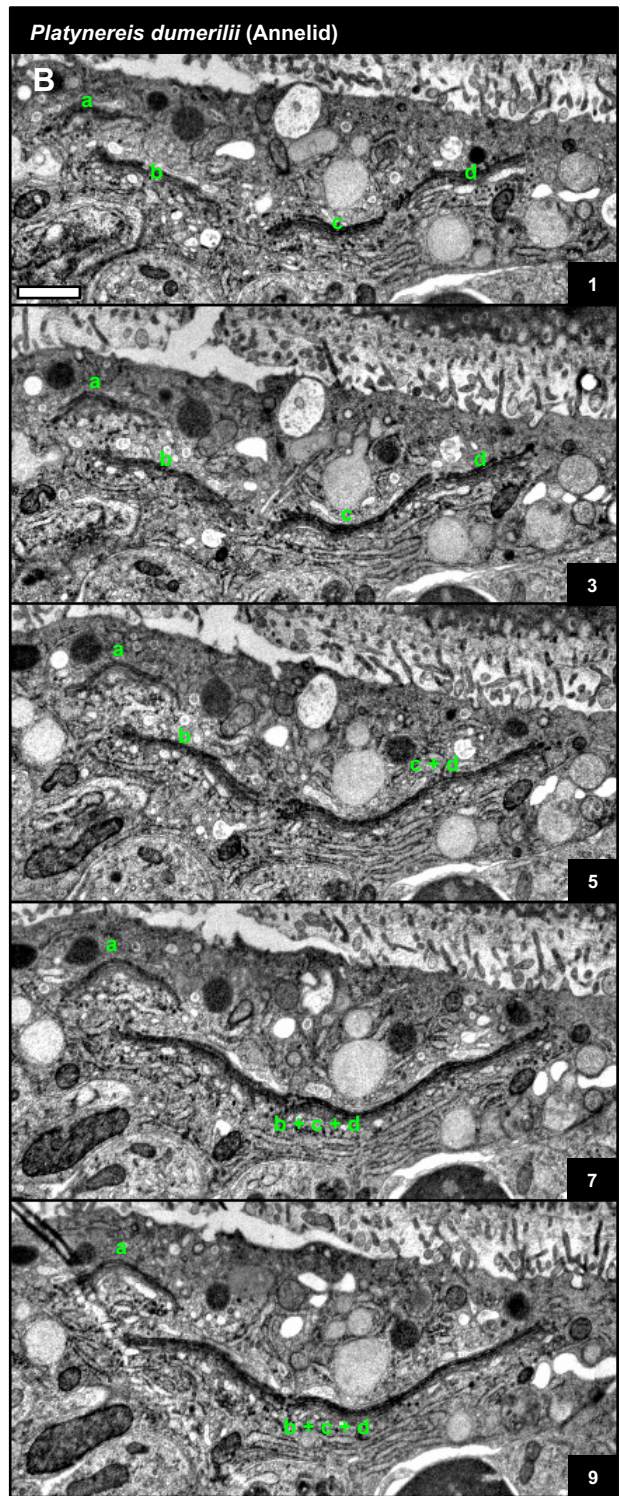

F

| Species                               | Taxon             | Multiple Golgi stacks per cell | Presence of ribbon-like Golgi | Source of morphological data | Tissues/cell types                                    |
|---------------------------------------|-------------------|--------------------------------|-------------------------------|------------------------------|-------------------------------------------------------|
| <i>C. robusta</i>                     | Tunicates         | +                              | +                             | This paper                   | epidermal cells of larva                              |
| <i>B. lanceolatum</i>                 | Cephalocordates   | +                              | +                             | This paper                   | ectodermal cells of gastrula                          |
| <i>S. purpuratus</i>                  | Echinoderms       | +                              | +                             | This paper                   | blastocoelar cells of pluteus larva                   |
| <i>P. lividus</i>                     | Echinoderms       | +                              | +                             | This paper                   | all cells from pre-hatching blastula to pluteus larva |
| <i>L. variegatus</i>                  | Echinoderms       | +                              | +                             | Literature                   | all cells in pre-hatching blastula                    |
| <i>L. pictus</i>                      | Echinoderms       | +                              | +                             | Literature                   | all cells in blastula and prism stage                 |
| <i>D. melanogaster</i>                | Arthropods        | +                              | -                             | Literature                   | all cell types (larva and adult) and cell lines       |
| <i>A. mellifera</i>                   | Arthropods        | +                              | -                             | Literature                   | Trophocyte                                            |
| <i>A. pisum</i>                       | Arthropods        | +                              | -                             | Literature                   | Mycetocytes                                           |
| <i>A. albopictus</i>                  | Arthropods        | +                              | -                             | Literature                   | cell line                                             |
| <i>P. hawaiiensis</i>                 | Arthropods        | +                              | -                             | This paper                   | all cell types (adult)                                |
| <i>C. elegans</i>                     | nematodes         | +                              | -                             | Literature                   | all cell types                                        |
| <i>C. inconspicua</i>                 | Brachiopods       | +                              | -                             | This paper                   | epidermal cells of 3-lobe larva                       |
| <i>P. vivipara</i>                    | Mollusks          | +                              | +                             | Literature                   | spermatocytes                                         |
| <i>H. pomatia</i>                     | Mollusks          | +                              | +                             | Literature                   | multified gland cells                                 |
| <i>H. aspersa</i>                     | Mollusks          | +                              | +                             | Literature                   | early spermatocytes                                   |
| <i>P. dumerilii</i>                   | Annelids          | +                              | +                             | This paper                   | several cell types of 3-day-old larva                 |
| <i>Lumbricus</i> (unreported species) | Annelids          | +                              | +                             | Literature                   | epithelial cells and neurons of adult                 |
| <i>S. roscoffensis</i>                | Xenacoelomorphs   | +                              | +                             | This paper                   | secretory granule producing cells                     |
| <i>C. hemisphaerica</i>               | Cnidarians        | +                              | +                             | This paper                   | gastrodermal cells of adult                           |
| <i>M. leidyi</i>                      | Ctenophores       | +                              | -                             | This paper                   | epithelial and comb cells                             |
| <i>T. adhaerens</i>                   | Placozoans        | -                              | N/A                           | This paper                   | all cell types                                        |
| <i>H. hongkongensis</i>               | Placozoans        | -                              | N/A                           | Literature                   | all cell types                                        |
| <i>O. carmela</i>                     | Sponges           | -                              | N/A                           | Literature and this paper    | all cell types                                        |
| <i>E. fluviatilis</i>                 | Sponges           | +                              | -                             | Literature                   | spongocyte                                            |
| <i>S. rosetta</i>                     | Choanoflagellates | -                              | N/A                           | Literature                   | N/A                                                   |
| <i>C. owczarzaki</i>                  | Filasterians      | -                              | N/A                           | This paper                   | N/A                                                   |

A

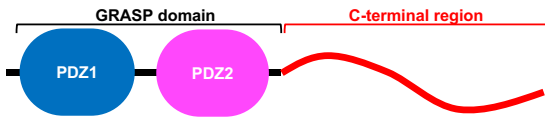

B

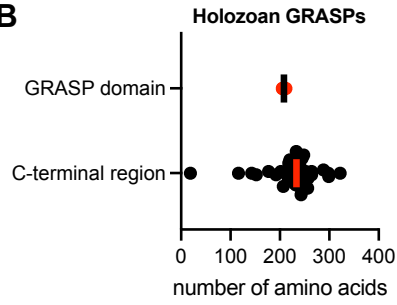

C

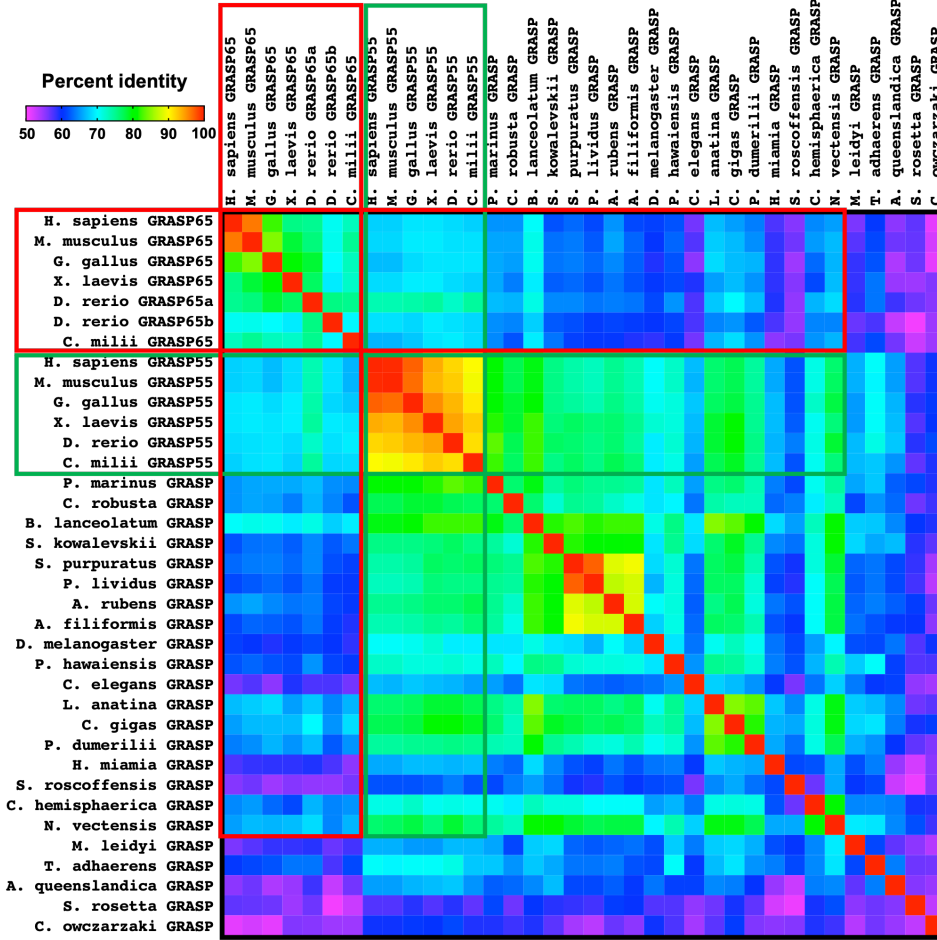

D

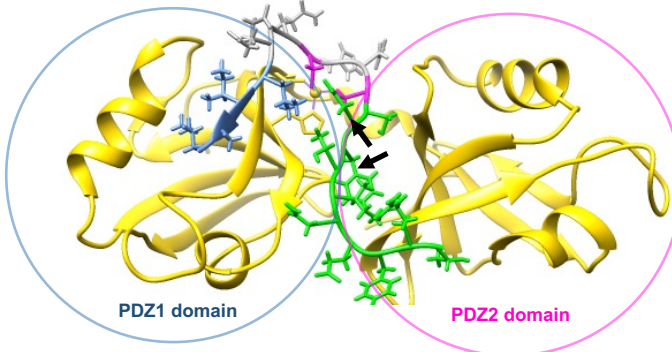

E

|                  |   |                                                    |     |     |        |         |                               |
|------------------|---|----------------------------------------------------|-----|-----|--------|---------|-------------------------------|
| H. sapiens       | R | -----YENIT-----                                    | FNC | CNH | CRG    | -EL-    | IAL                           |
| M. musculus      | R | -----YENIT-----                                    | FNC | CNH | CQG    | -EL-    | IAL                           |
| G. gallus        | R | -----YEDIT-----                                    | FNC | CDH | CQG    | -EL-    | IAL                           |
| X. laevis        | R | -----YENIT-----                                    | FNC | CN  | QCRG   | -EL-    | IAV                           |
| D. rerio         | R | -----YENIT-----                                    | FNC | CN  | CNG    | -EL-    | IVL                           |
| C. milii         | R | -----YENIT-----                                    | FNC | CER | CHG    | -EI-    | IVL                           |
| P. marinus       | R | -----YEHIT-----                                    | FTC | CSR | CTG    | -DI-    | VVV                           |
| C. robusta       | Q | -----HENIT-----                                    | LN  | C   | VNCKG  | -EI-    | HVI                           |
| B. lanceolatum   | K | -----YEEIT-----                                    | VNC | CD  | CKG    | -EI-    | KVV                           |
| S. kowalevskii   | N | -----YENLT-----                                    | INC | CP  | YCTG   | -DI-    | KVV                           |
| S. purpuratus    | C | -----YENIT-----                                    | INC | CD  | RCTG   | -DI-    | KVV                           |
| P. lividus       | R | -----YENIT-----                                    | INC | CD  | RCKG   | -DI-    | KVV                           |
| A. rubens        | T | -----YENLT-----                                    | VNC | CK  | YCKG   | -DI-    | KLV                           |
| A. filiformis    | K | -----YENLT-----                                    | INC | CN  | YCTG   | -DL-    | LVV                           |
| D. melanogaster  | P | -----ASEVT-----                                    | --- | --- | SPACDN | QQLDKMQ |                               |
| P. hawaiiensis   | R | -----HSSVK-----                                    | --- | --- | ---    | ---     | YI-KLG                        |
| C. elegans       | K | -----YTNLT-----                                    | IAC | CK  | N      | CMGRD   | I-QLL                         |
| L. anatina       | R | -----FEQLT-----                                    | FCS | CK  | H      | CSG     | -EI-QVV                       |
| C. gigas         | N | -----FDNLT-----                                    | FNC | CE  | K      | CKG     | -EL-TAV                       |
| P. dumerilii     | R | -----YENIT-----                                    | FNC | CS  | N      | CLG     | -EL-QVV                       |
| H. miamia        | N | -----FDNLE-----                                    | --- | --- | FSI    | CK      | CKNNTI-EVV                    |
| C. hemisphaerica | T | -----NYNVT-----                                    | FNC | CE  | K      | CKG     | -PI-YIV                       |
| N. vectensis     | N | -----SFRVT-----                                    | YDC | CD  | R      | CTG     | -PV-HVV                       |
| M. leidy         | L | -----QQNVNGKMRE                                    | --- | --- | LFVA   | CK      | TKQON                         |
| T. adhaerens     | D | ---NSSTPSK---QTLYGS                                | --- | --- | NKNVT  | ---     | RSYSGC---KKTMEVGGCKSAEKEI-LHL |
| A. queenslandica | D | DRH-DGNNDI                                         | --- | --- | ANNNS  | ---     | YFCNKCNGRAI-MII               |
| C. owczarzewski  | P | SNHFDSATPISLGVSNLNSAEEDYSPALERVTTLMRERTSTMPNSSSQLD | --- | --- | ---    | ---     | CKAKRG-PI-IHL                 |



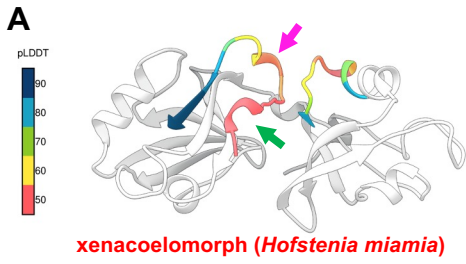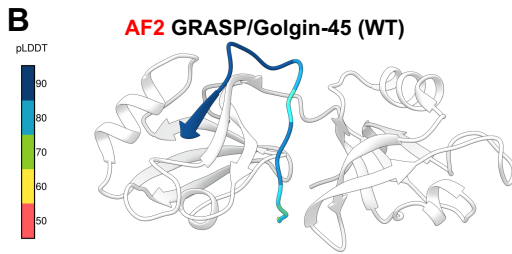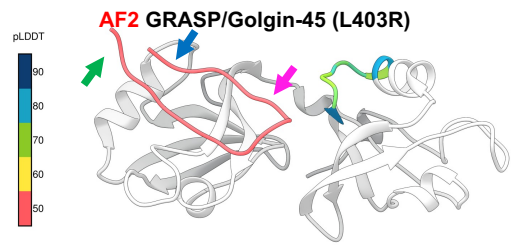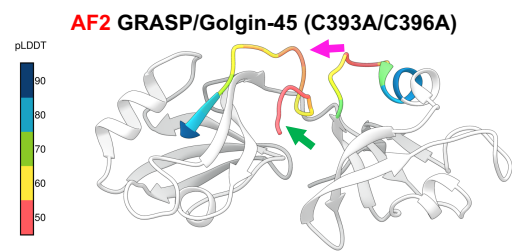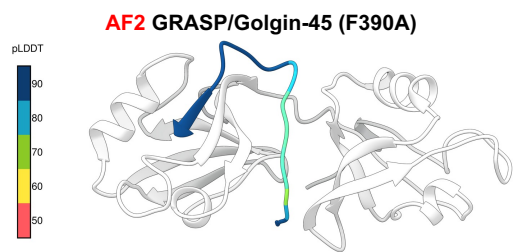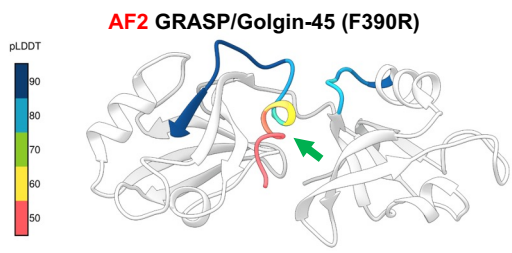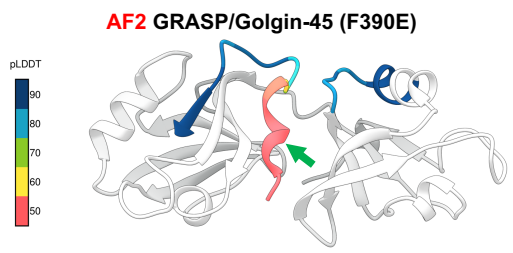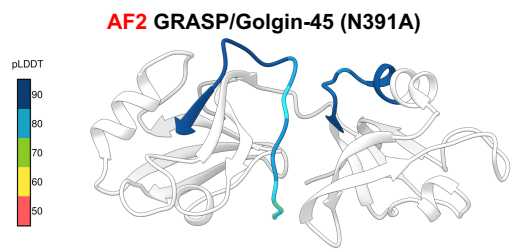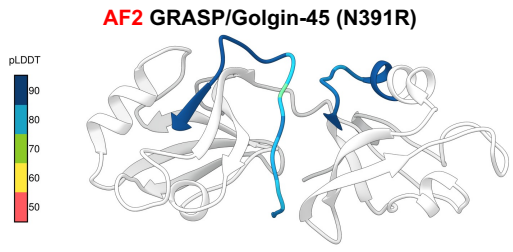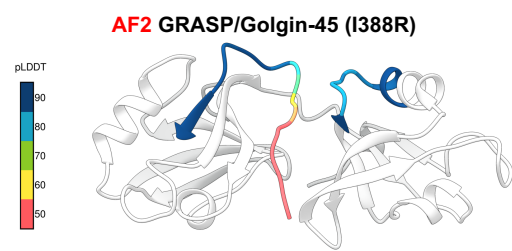

Source: https://www.biorxiv.org/content/10.1101/2023.02.16.528797v1.full.pdf
